# Supplementary material for: Cytotoxic and Anti-Inflammatory Metabolites from the Soft Coral Scleronephthya gracillimum
Source: PubMed Central journal article supplement (PMC3721209; doi:10.3390/md11061853), 2013-05-29

## Supplementary Information

|                    |                                                                         |    |
|--------------------|-------------------------------------------------------------------------|----|
| <b>Figure S1.</b>  | $^1\text{H}$ NMR spectrum of <b>1</b> in $\text{CDCl}_3$ at 500 MHz.    | 2  |
| <b>Figure S2.</b>  | $^{13}\text{C}$ NMR spectrum of <b>1</b> in $\text{CDCl}_3$ at 125 MHz. | 3  |
| <b>Figure S3.</b>  | HRESI spectrum of <b>1</b> .                                            | 4  |
| <b>Figure S4.</b>  | $^1\text{H}$ NMR spectrum of <b>2</b> in $\text{CDCl}_3$ at 500 MHz.    | 5  |
| <b>Figure S5.</b>  | $^{13}\text{C}$ NMR spectrum of <b>2</b> in $\text{CDCl}_3$ at 125 MHz. | 6  |
| <b>Figure S6.</b>  | HRESI spectrum of <b>2</b> .                                            | 7  |
| <b>Figure S7.</b>  | $^1\text{H}$ NMR spectrum of <b>3</b> in $\text{CDCl}_3$ at 400 MHz.    | 8  |
| <b>Figure S8.</b>  | $^{13}\text{C}$ NMR spectrum of <b>3</b> in $\text{CDCl}_3$ at 100 MHz. | 9  |
| <b>Figure S9.</b>  | HRESI spectrum of <b>3</b> .                                            | 10 |
| <b>Figure S10.</b> | $^1\text{H}$ NMR spectrum of <b>4</b> in $\text{CDCl}_3$ at 500 MHz.    | 11 |
| <b>Figure S11.</b> | $^{13}\text{C}$ NMR spectrum of <b>4</b> in $\text{CDCl}_3$ at 125 MHz. | 12 |
| <b>Figure S12.</b> | HRESI spectrum of <b>4</b> .                                            | 13 |
| <b>Figure S13.</b> | $^1\text{H}$ NMR spectrum of <b>5</b> in $\text{CDCl}_3$ at 500 MHz.    | 14 |
| <b>Figure S14.</b> | $^{13}\text{C}$ NMR spectrum of <b>5</b> in $\text{CDCl}_3$ at 125 MHz. | 15 |
| <b>Figure S15.</b> | HRESI spectrum of <b>5</b> .                                            | 16 |
| <b>Figure S16.</b> | $^1\text{H}$ NMR spectrum of <b>6</b> in $\text{CDCl}_3$ at 400 MHz.    | 17 |
| <b>Figure S17.</b> | $^{13}\text{C}$ NMR spectrum of <b>6</b> in $\text{CDCl}_3$ at 100 MHz. | 18 |
| <b>Figure S18.</b> | HRESI spectrum of <b>6</b> .                                            | 19 |

Figure S1.  $^1\text{H}$  NMR spectrum of **1** in  $\text{CDCl}_3$  at 500 MHz.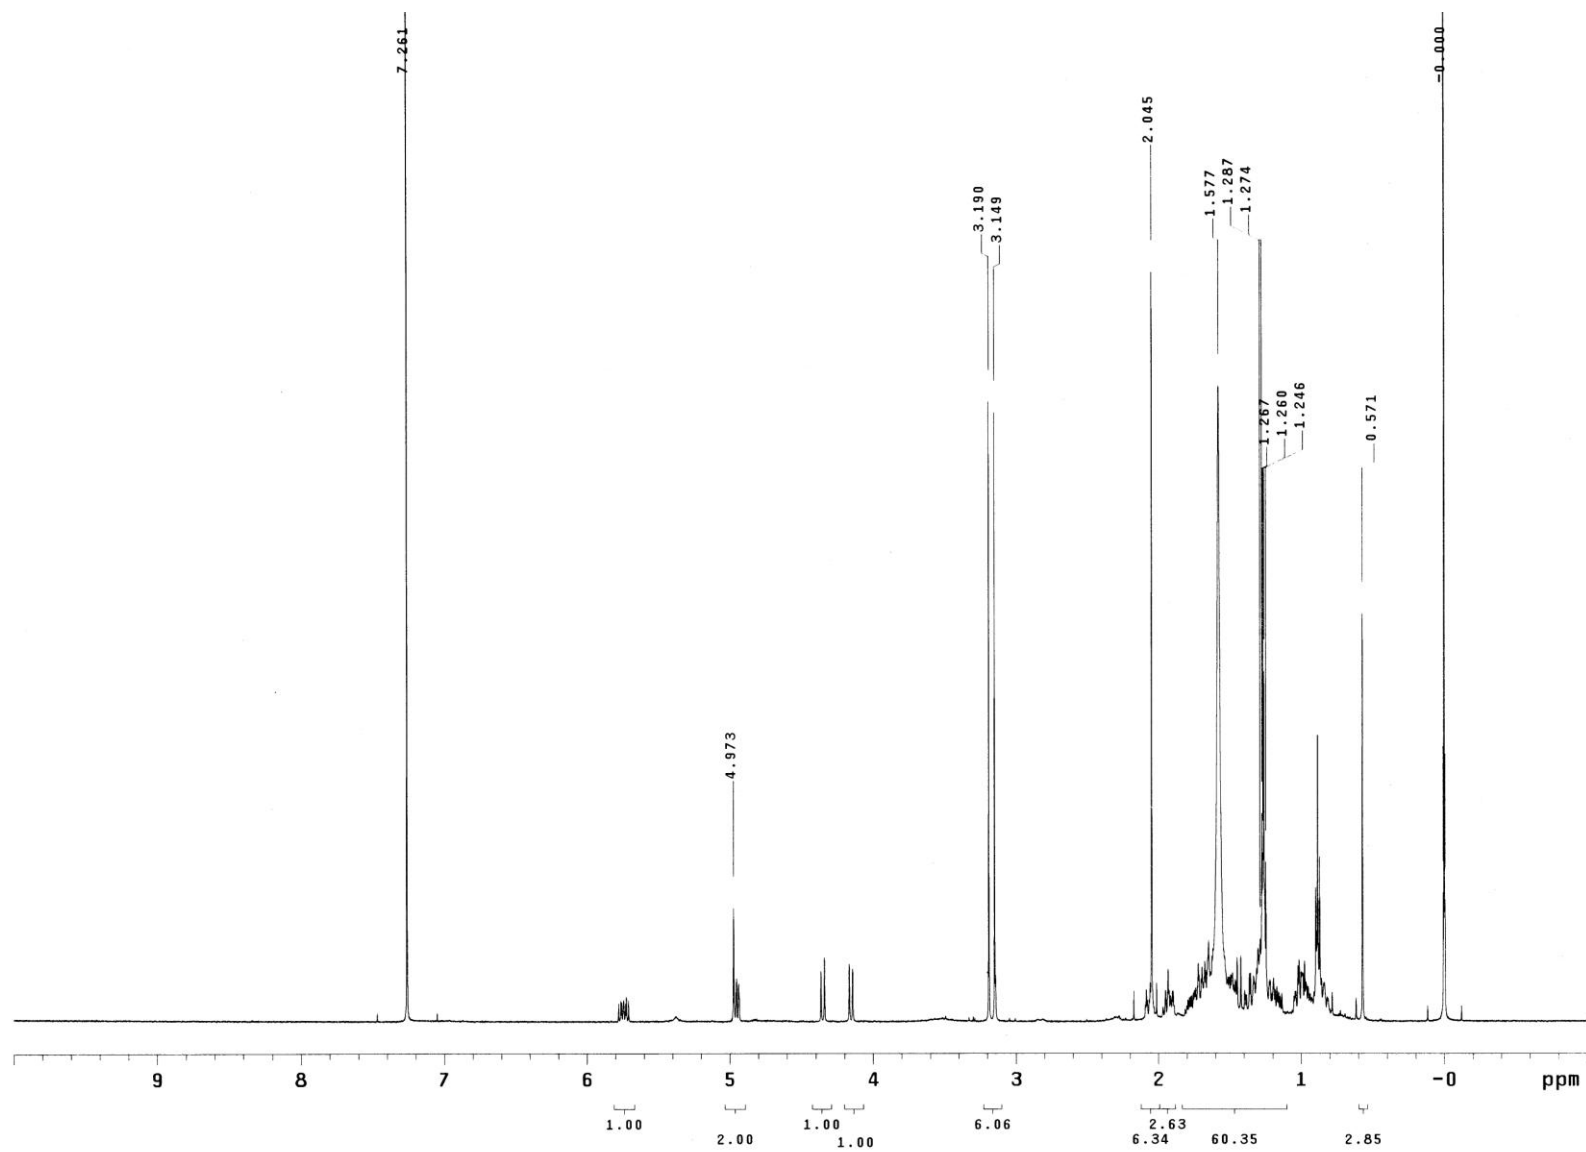

**Figure S2.**  $^{13}\text{C}$  NMR spectrum of **1** in  $\text{CDCl}_3$  at 125 MHz.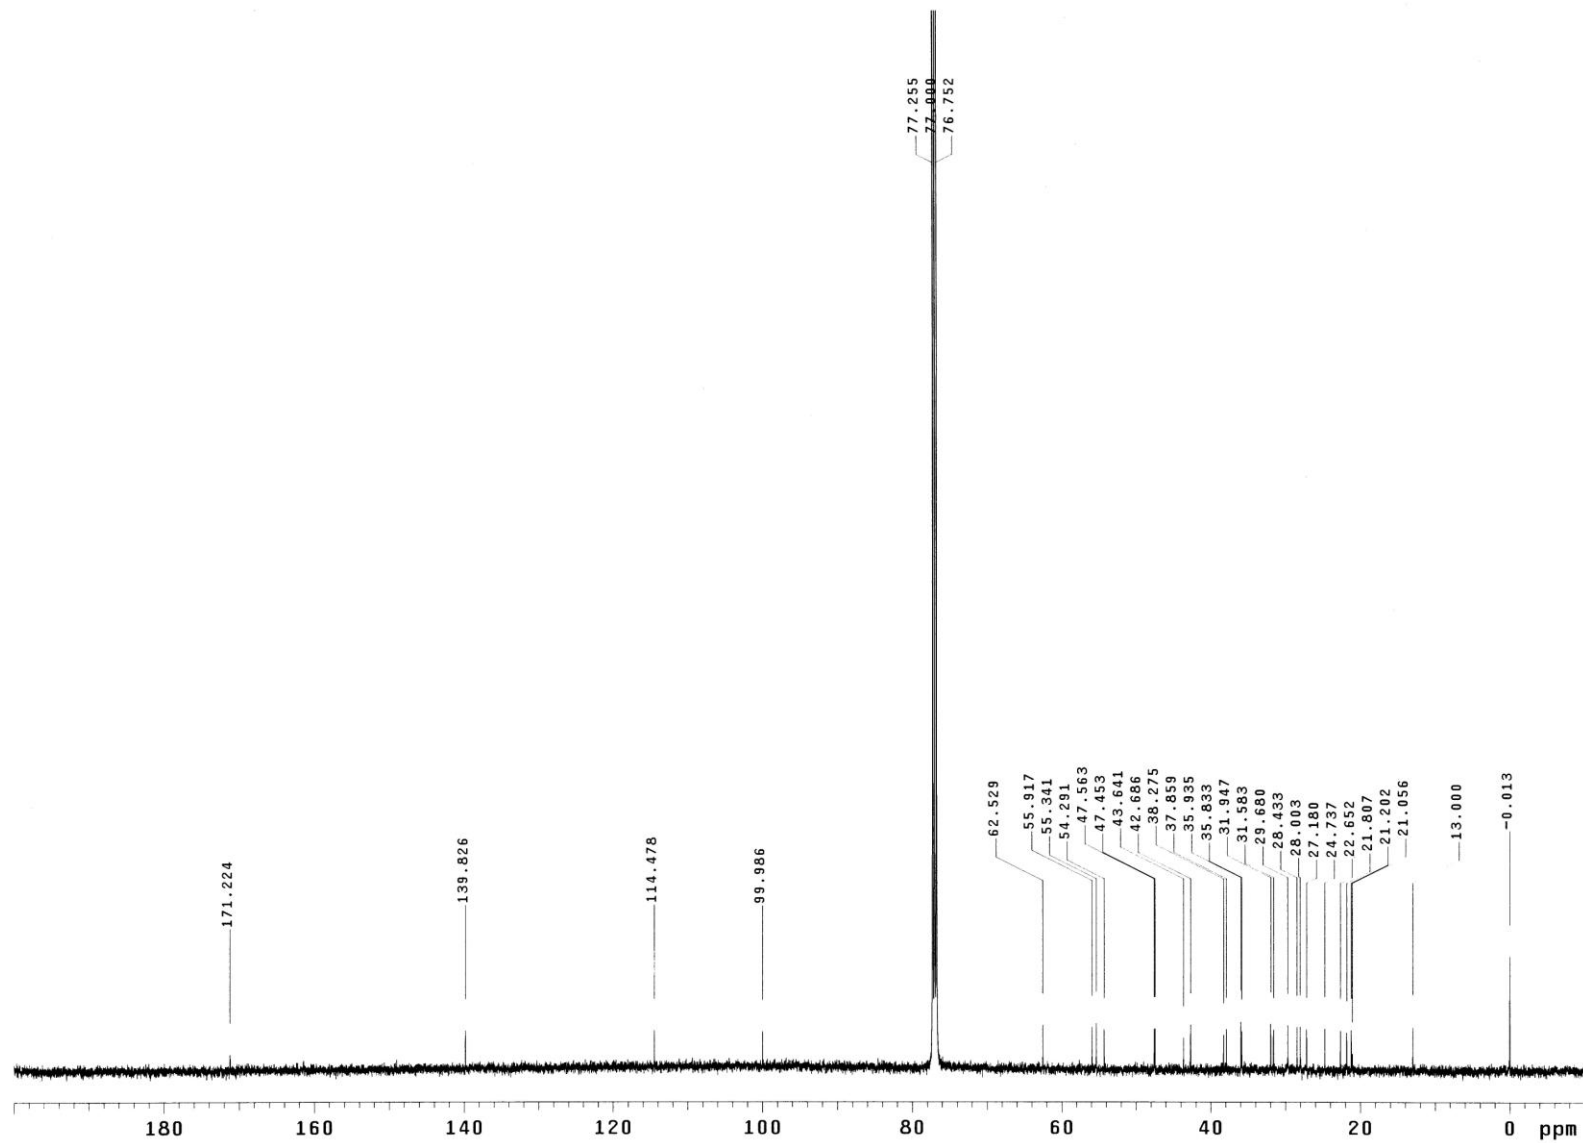

Figure S3. HRESIMS spectrum of 1.

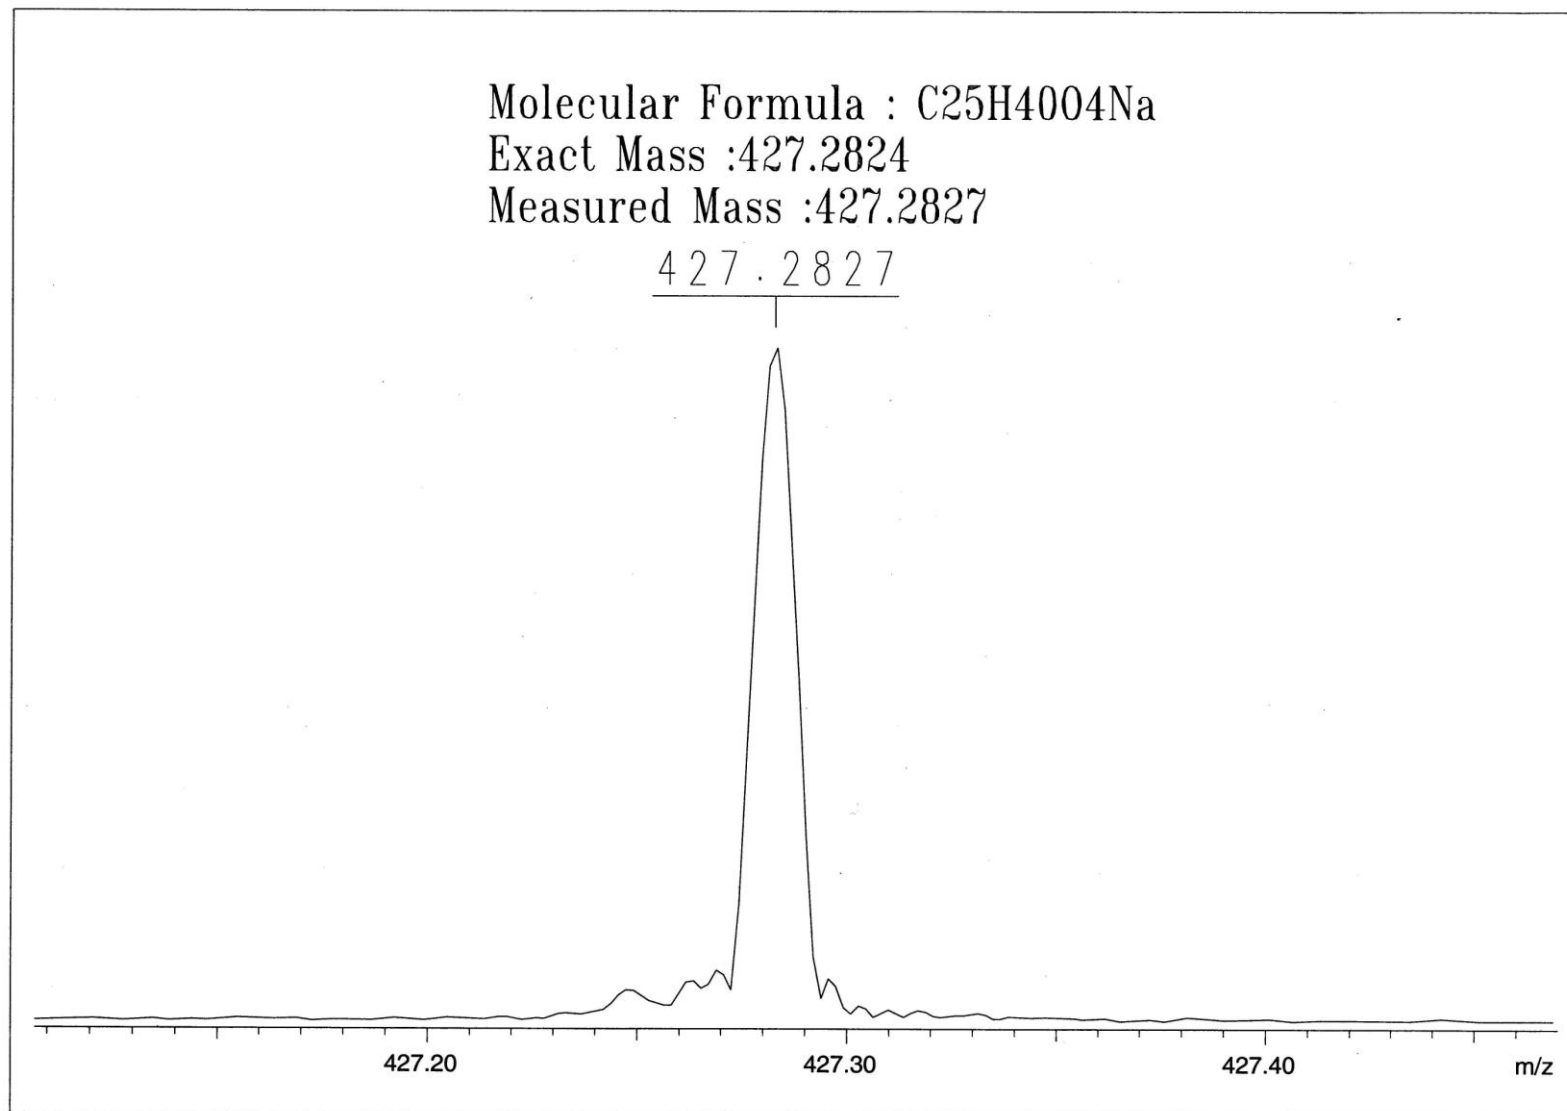

**Figure S4.**  $^1\text{H}$  NMR spectrum of **2** in  $\text{CDCl}_3$  at 500 MHz.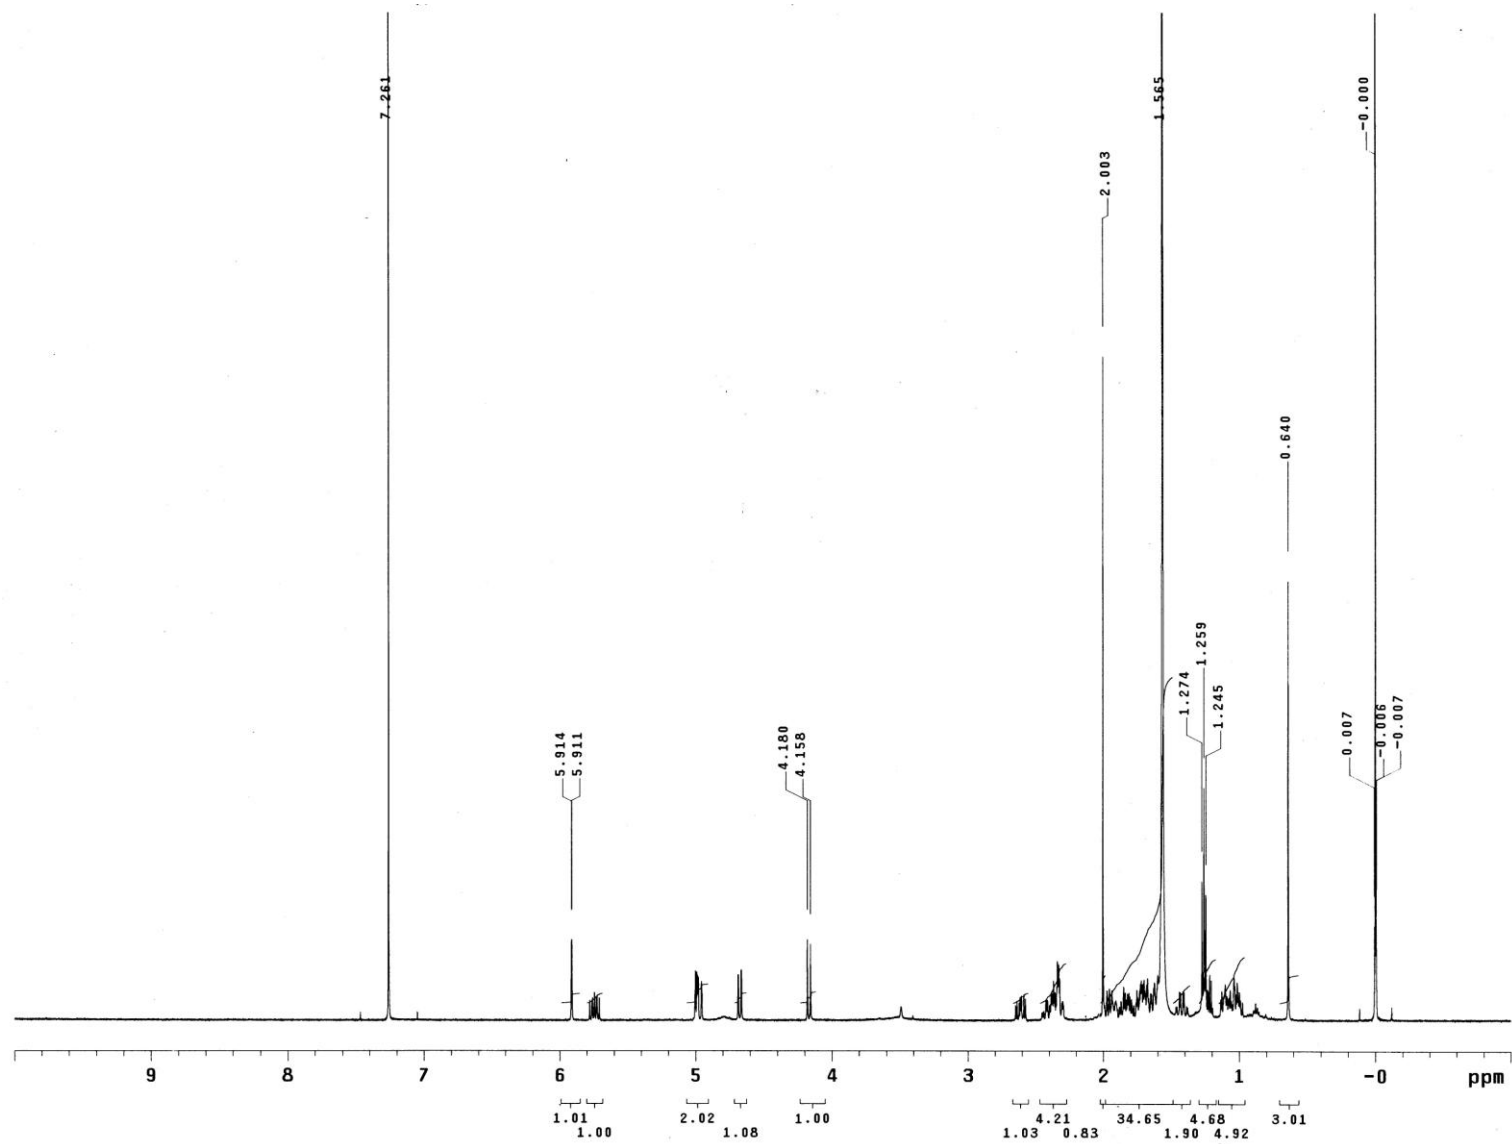

**Figure S5.**  $^{13}\text{C}$  NMR spectrum of **2** in  $\text{CDCl}_3$  at 125 MHz.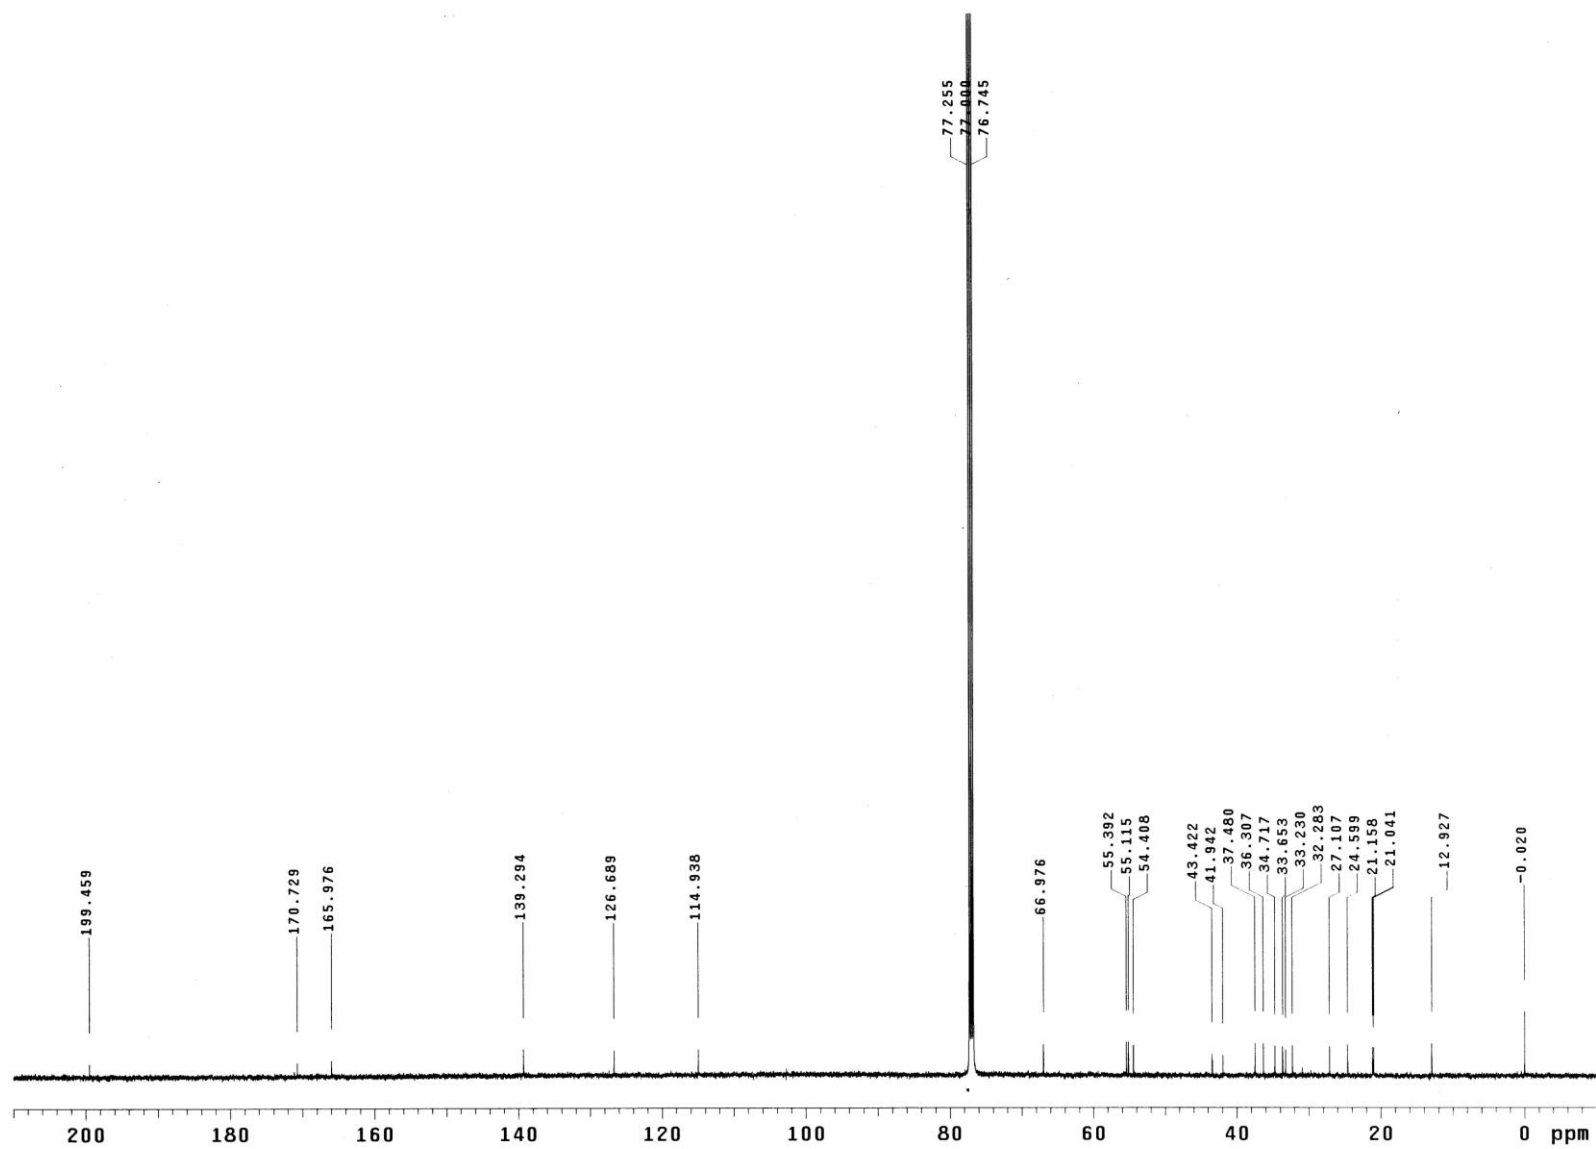

Figure S6. HRESIMS spectrum of 2.

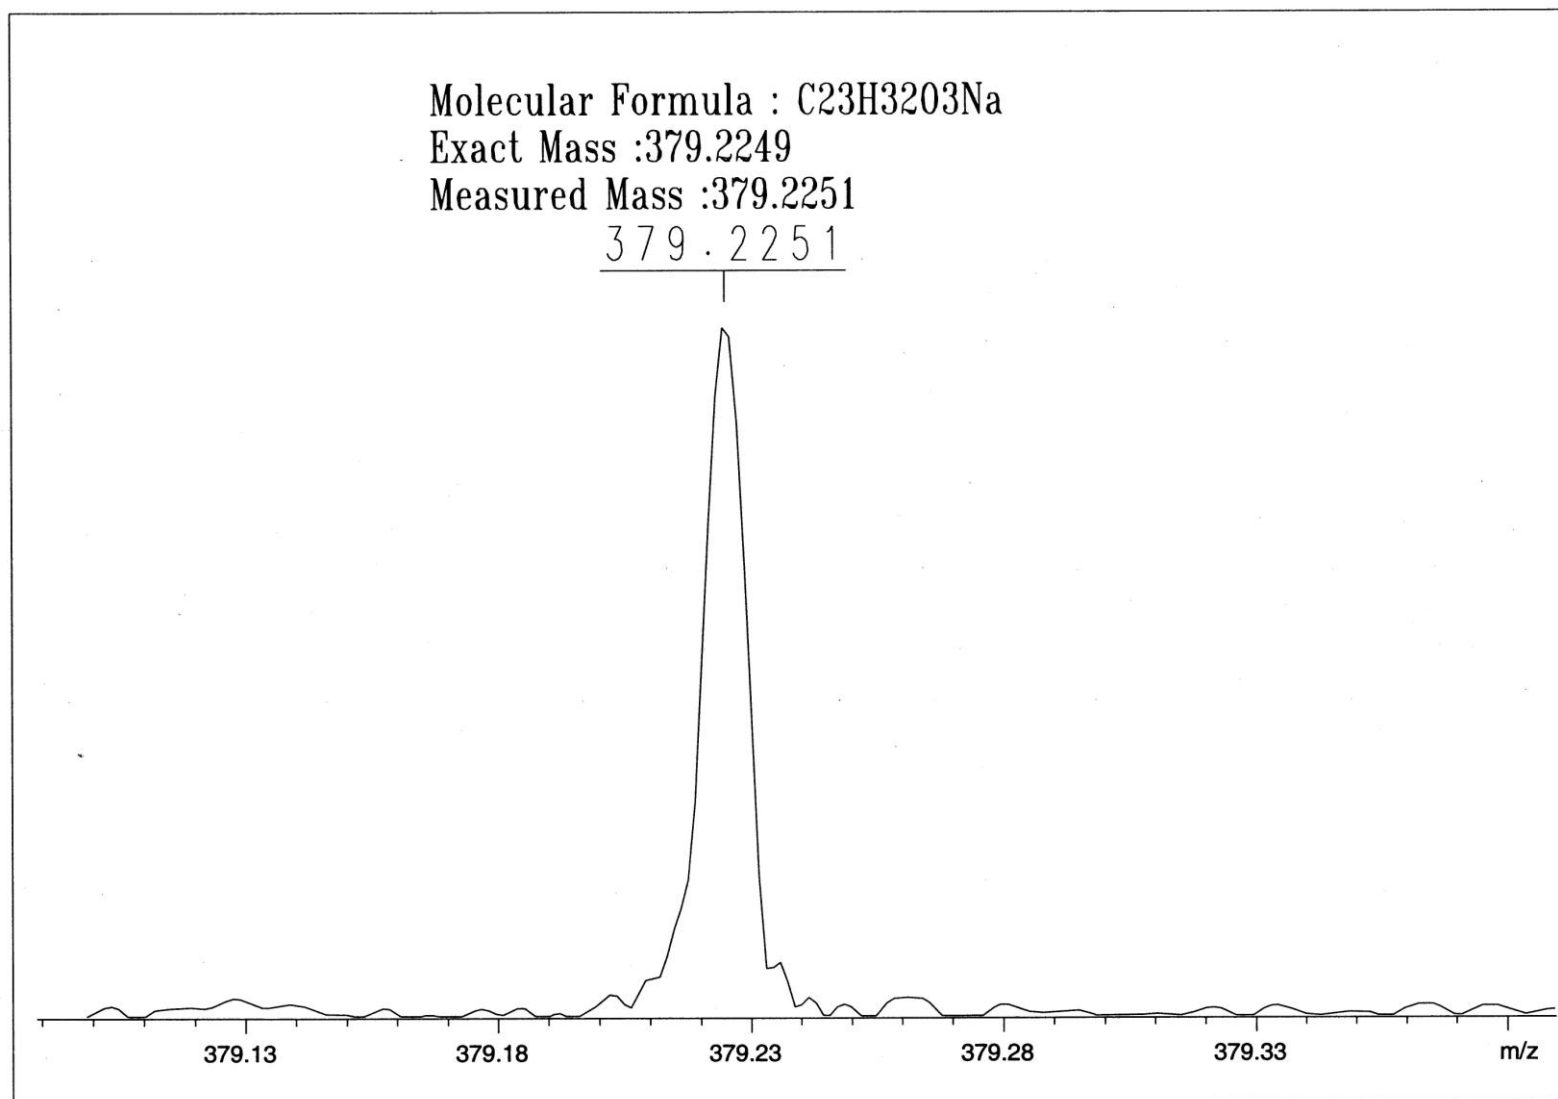

Figure S7.  $^1\text{H}$  NMR spectrum of **3** in  $\text{CDCl}_3$  at 500 MHz.

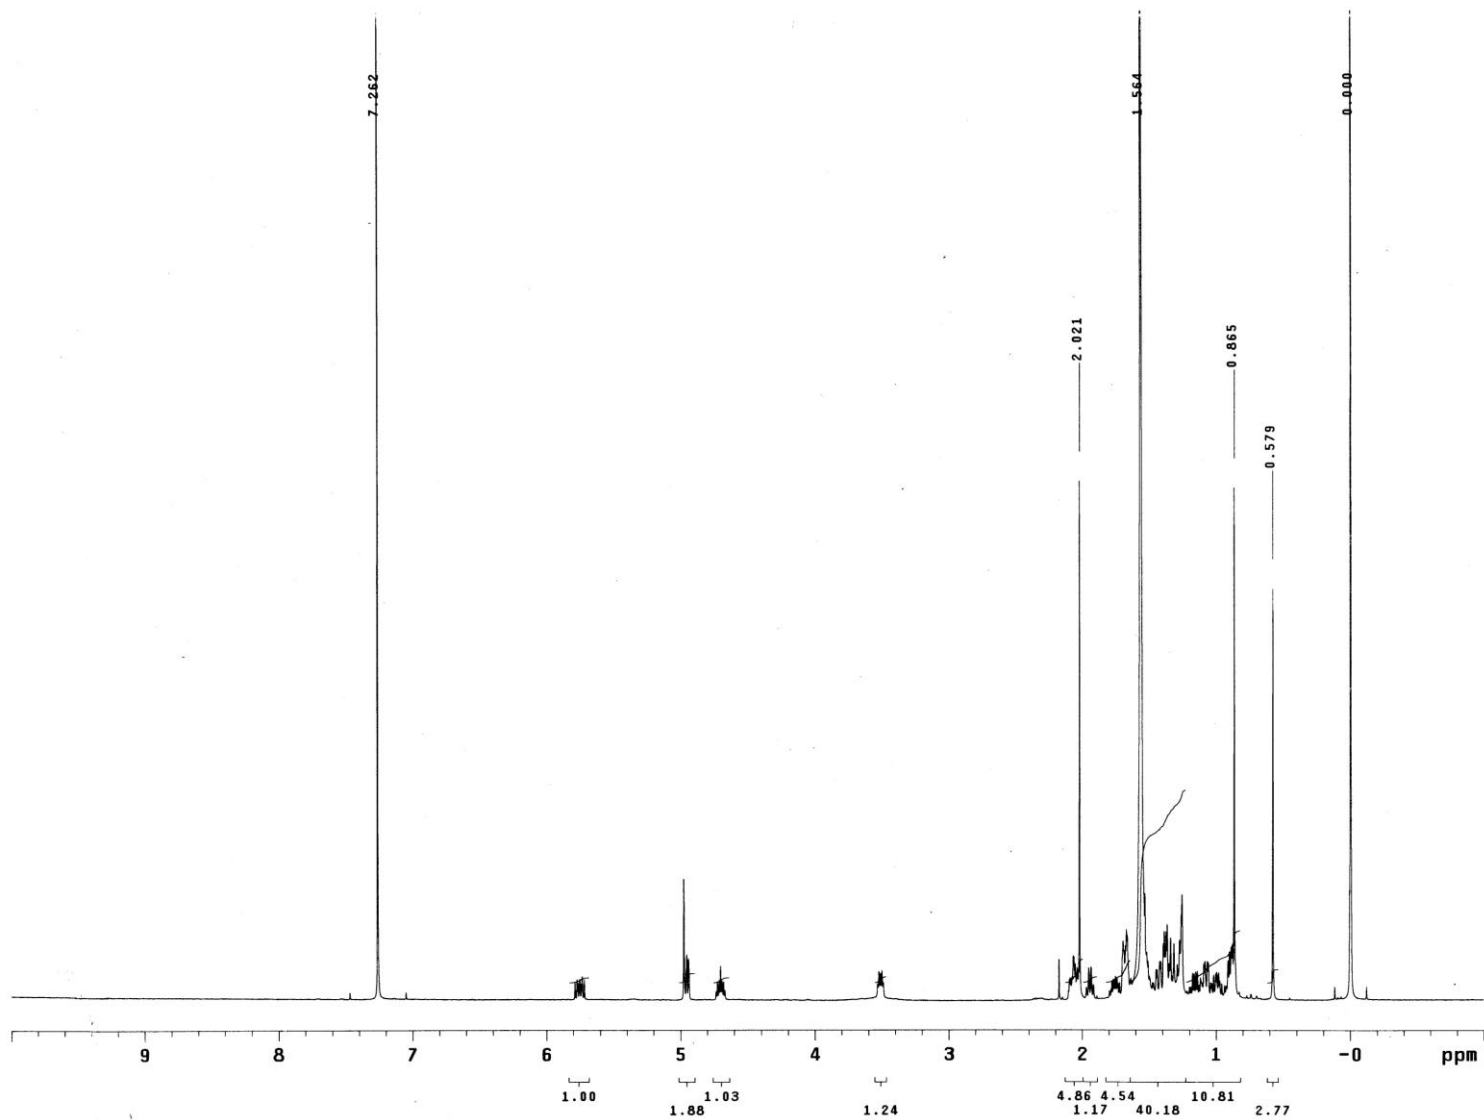



**Figure S8.**  $^{13}\text{C}$  NMR spectrum of **3** in  $\text{CDCl}_3$  at 125 MHz.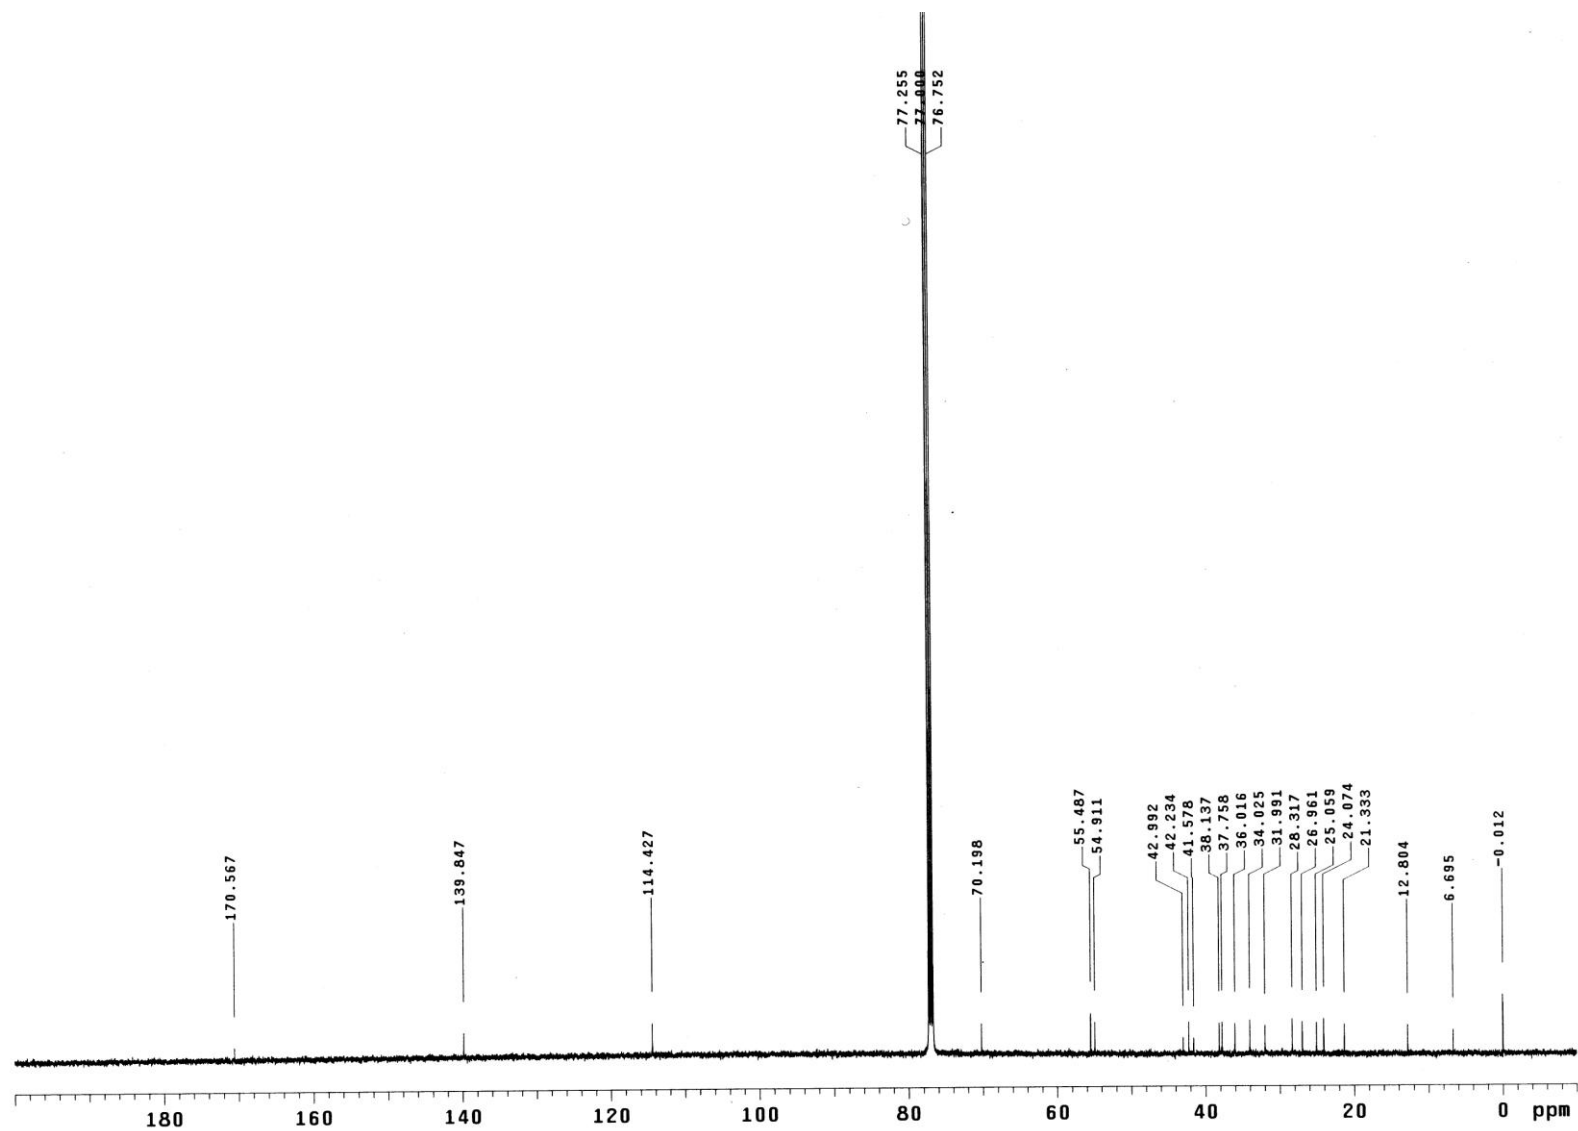

Figure S9. HRESIMS spectrum of 3.

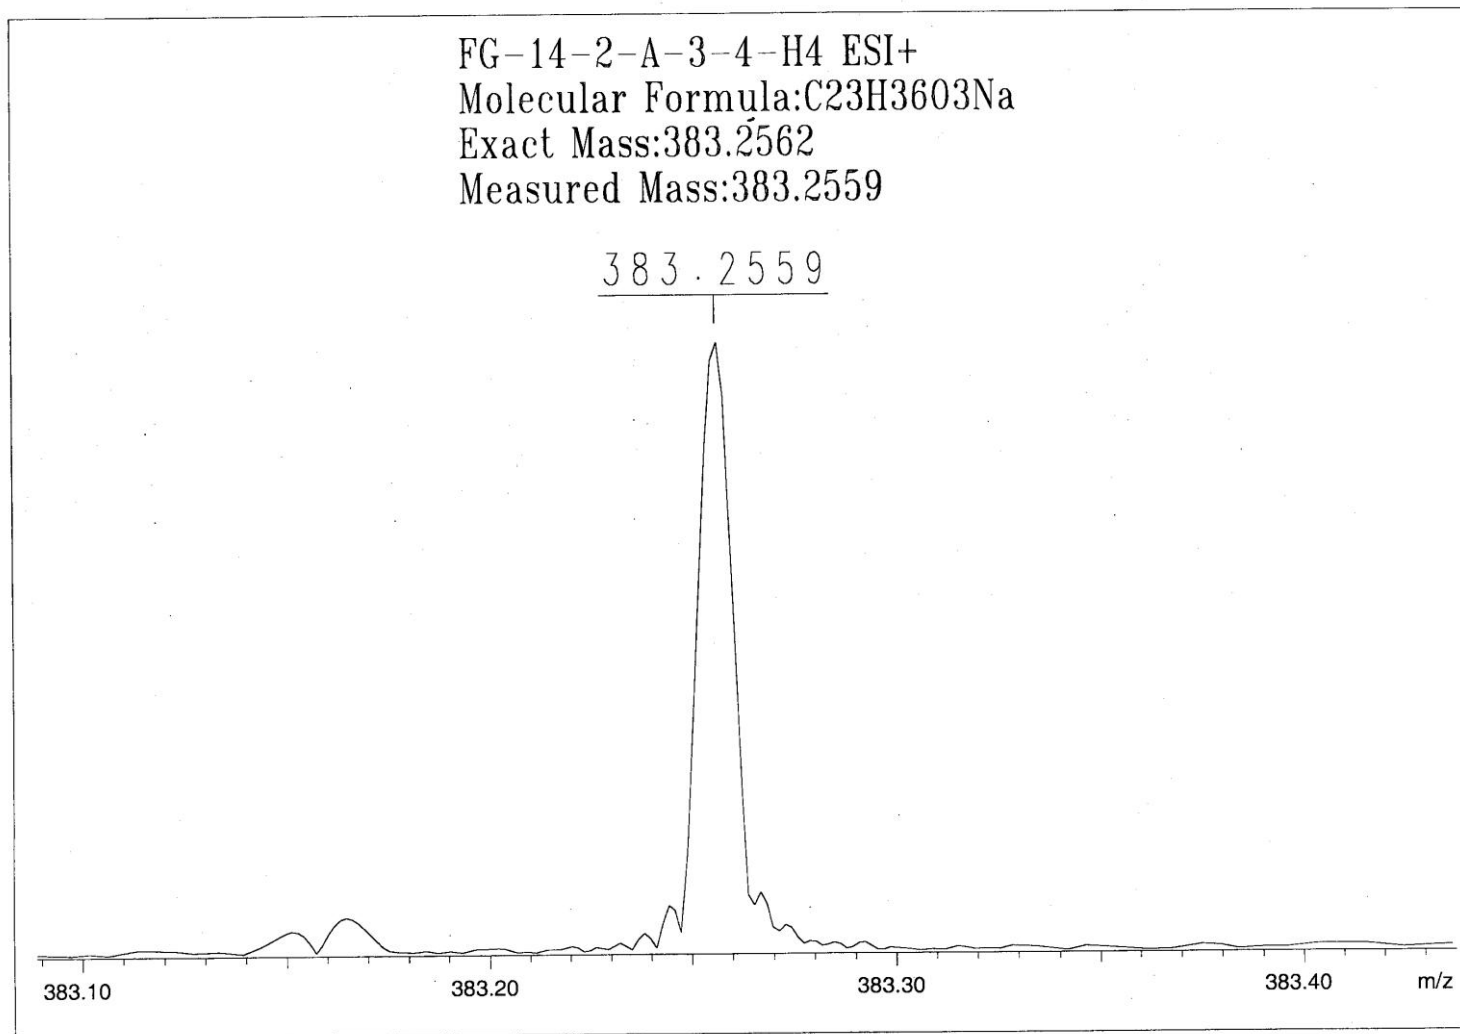

Figure S10.  $^1\text{H}$  NMR spectrum of **4** in  $\text{CDCl}_3$  at 500 MHz.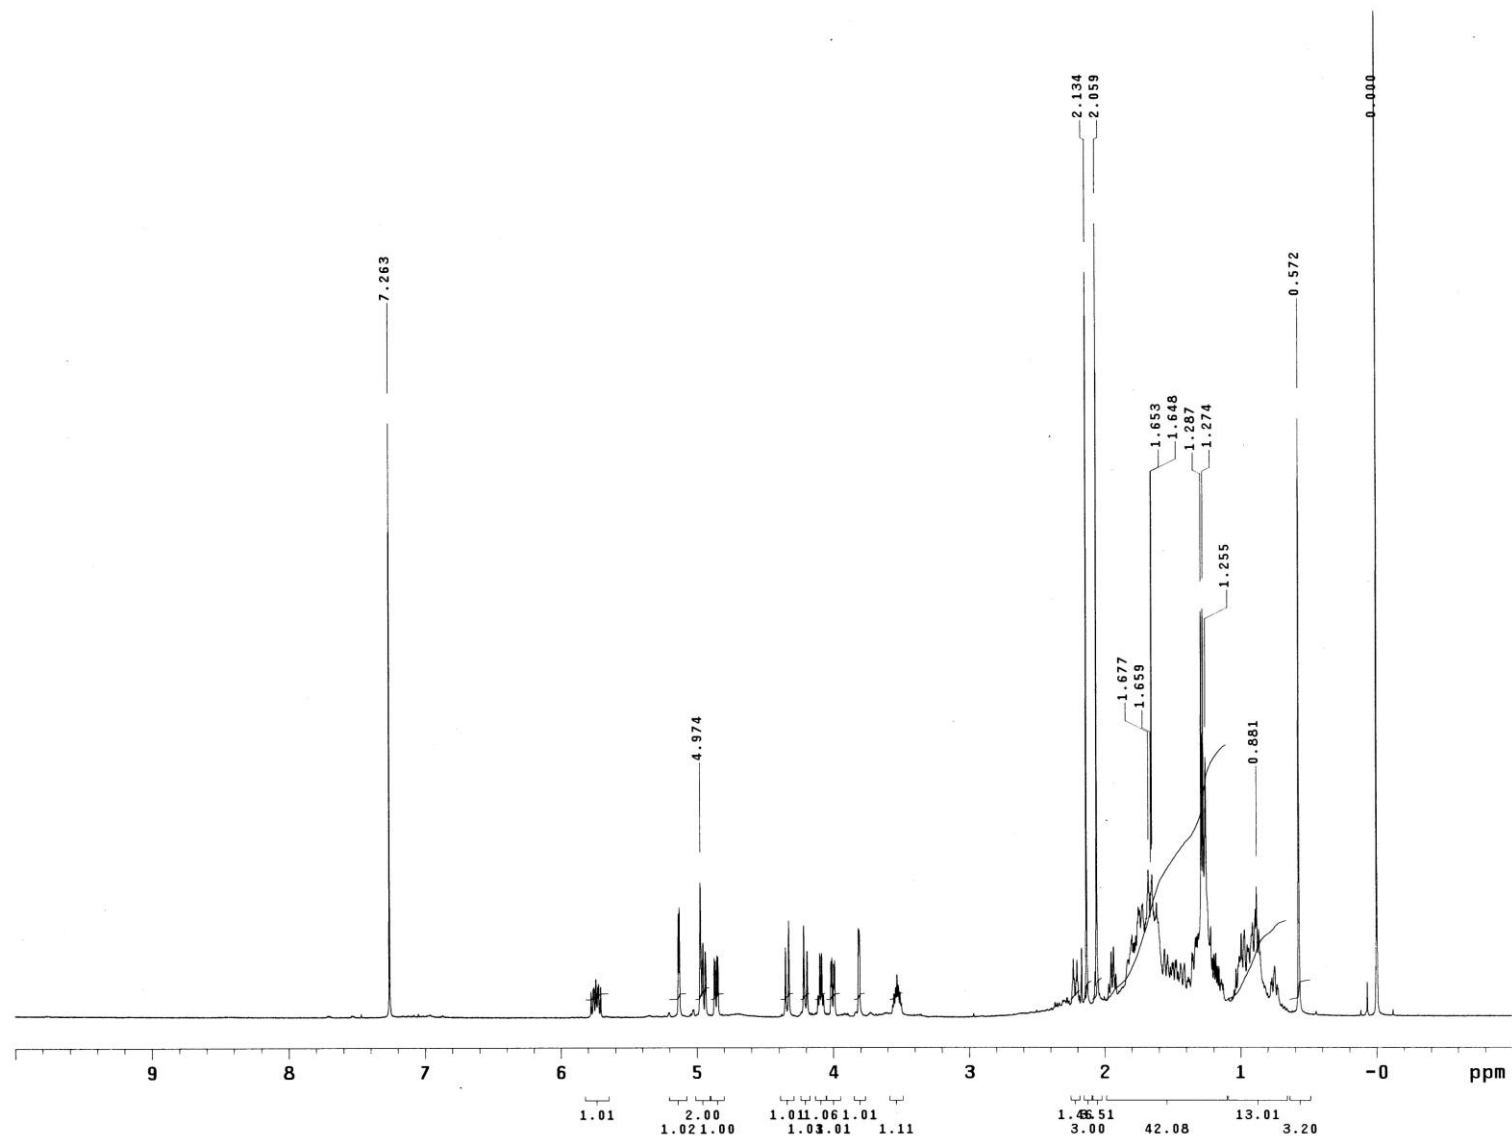

Figure S11.  $^{13}\text{C}$  NMR spectrum of **4** in  $\text{CDCl}_3$  at 125 MHz.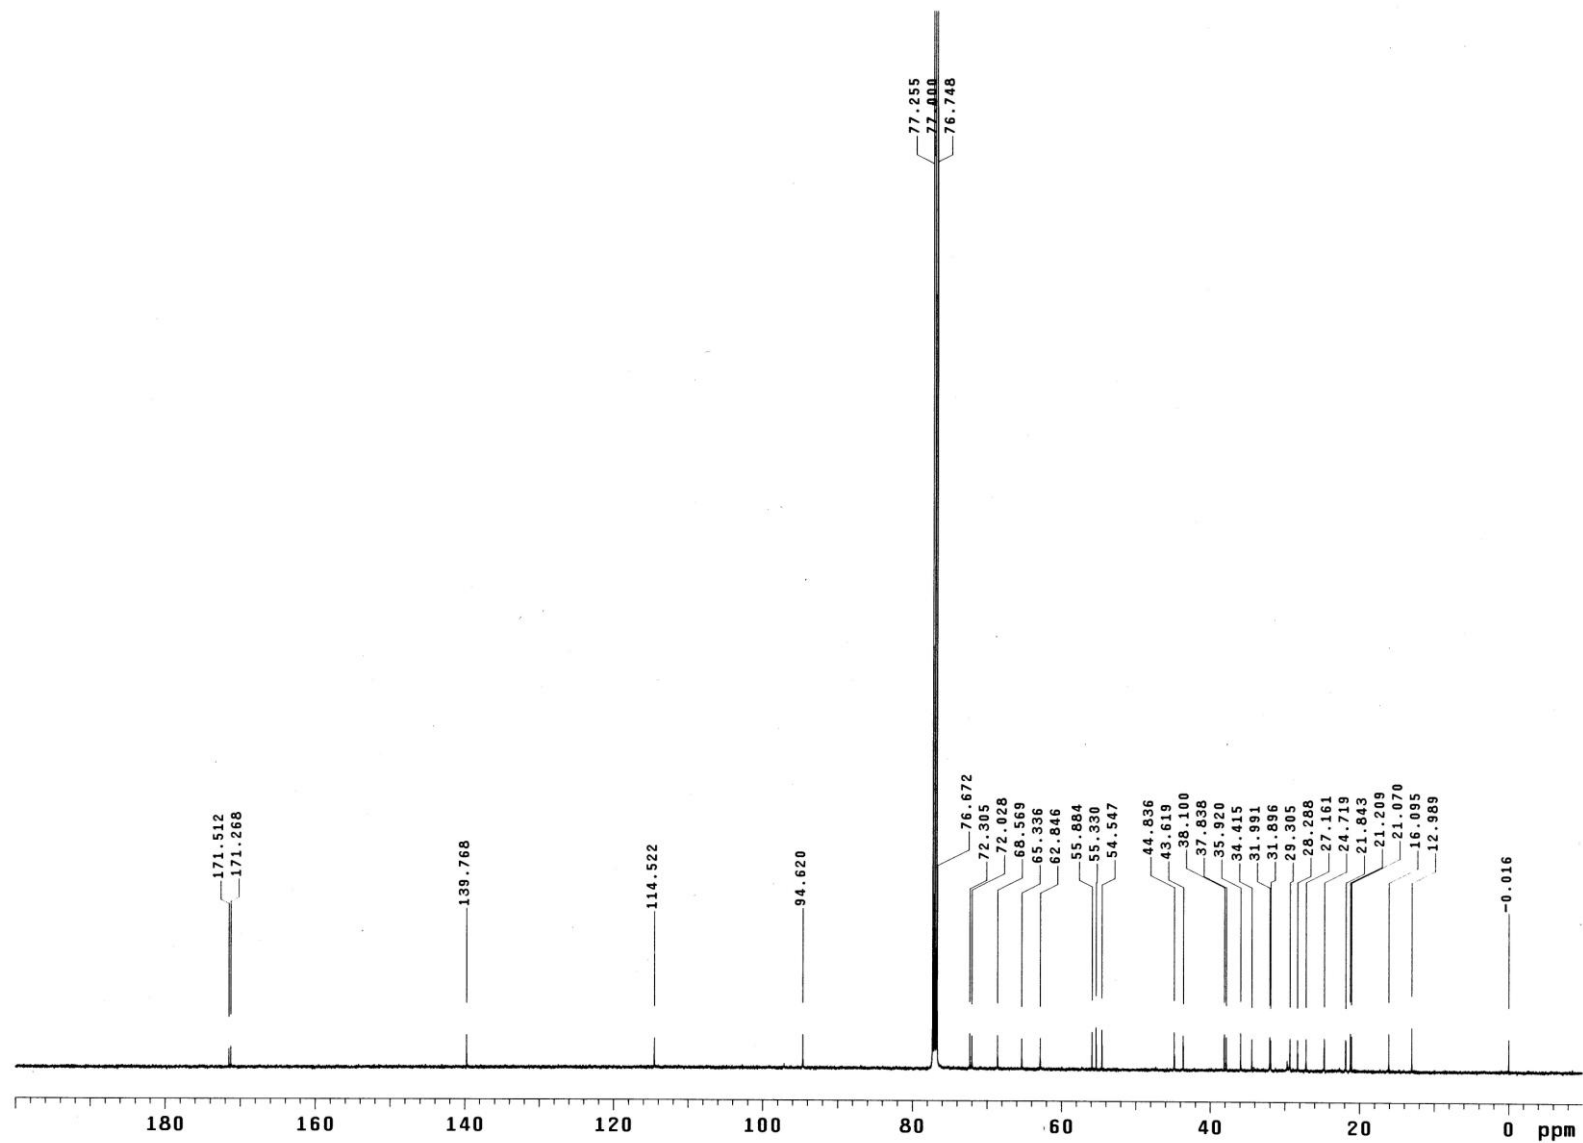

Figure S12. HRESIMS spectrum of 4.

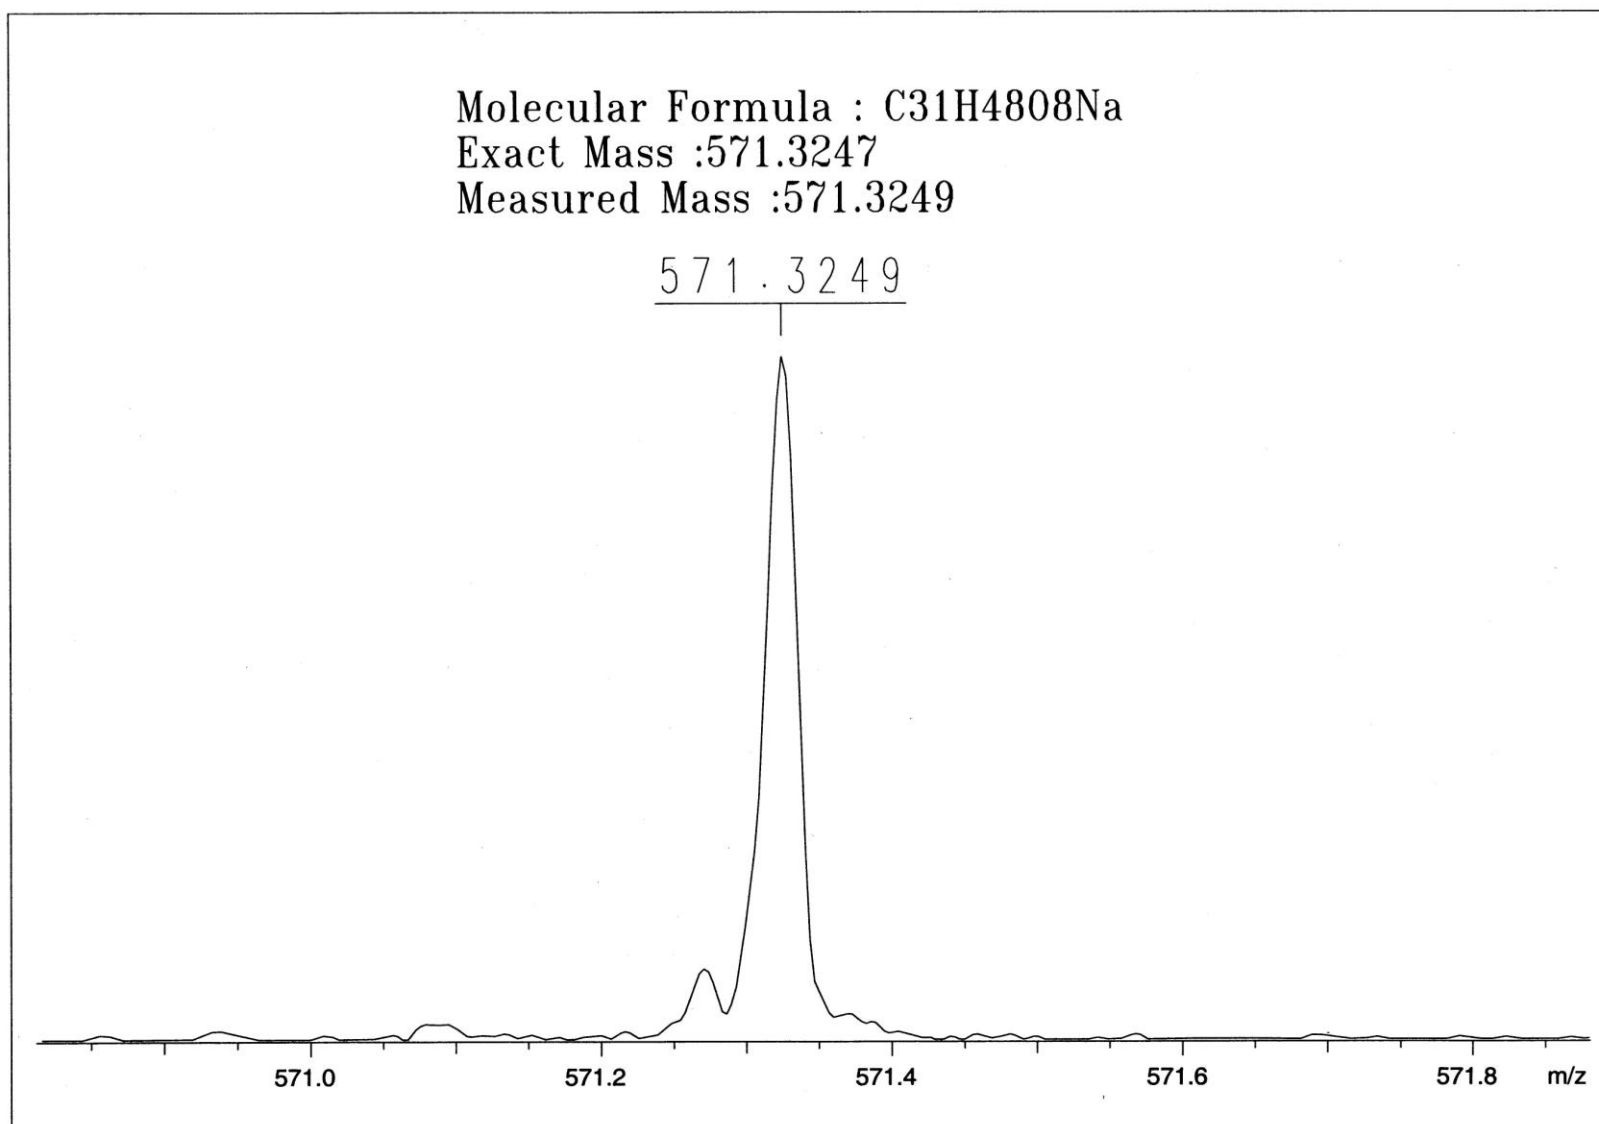

Figure S13.  $^1\text{H}$  NMR spectrum of **5** in  $\text{CDCl}_3$  at 400 MHz.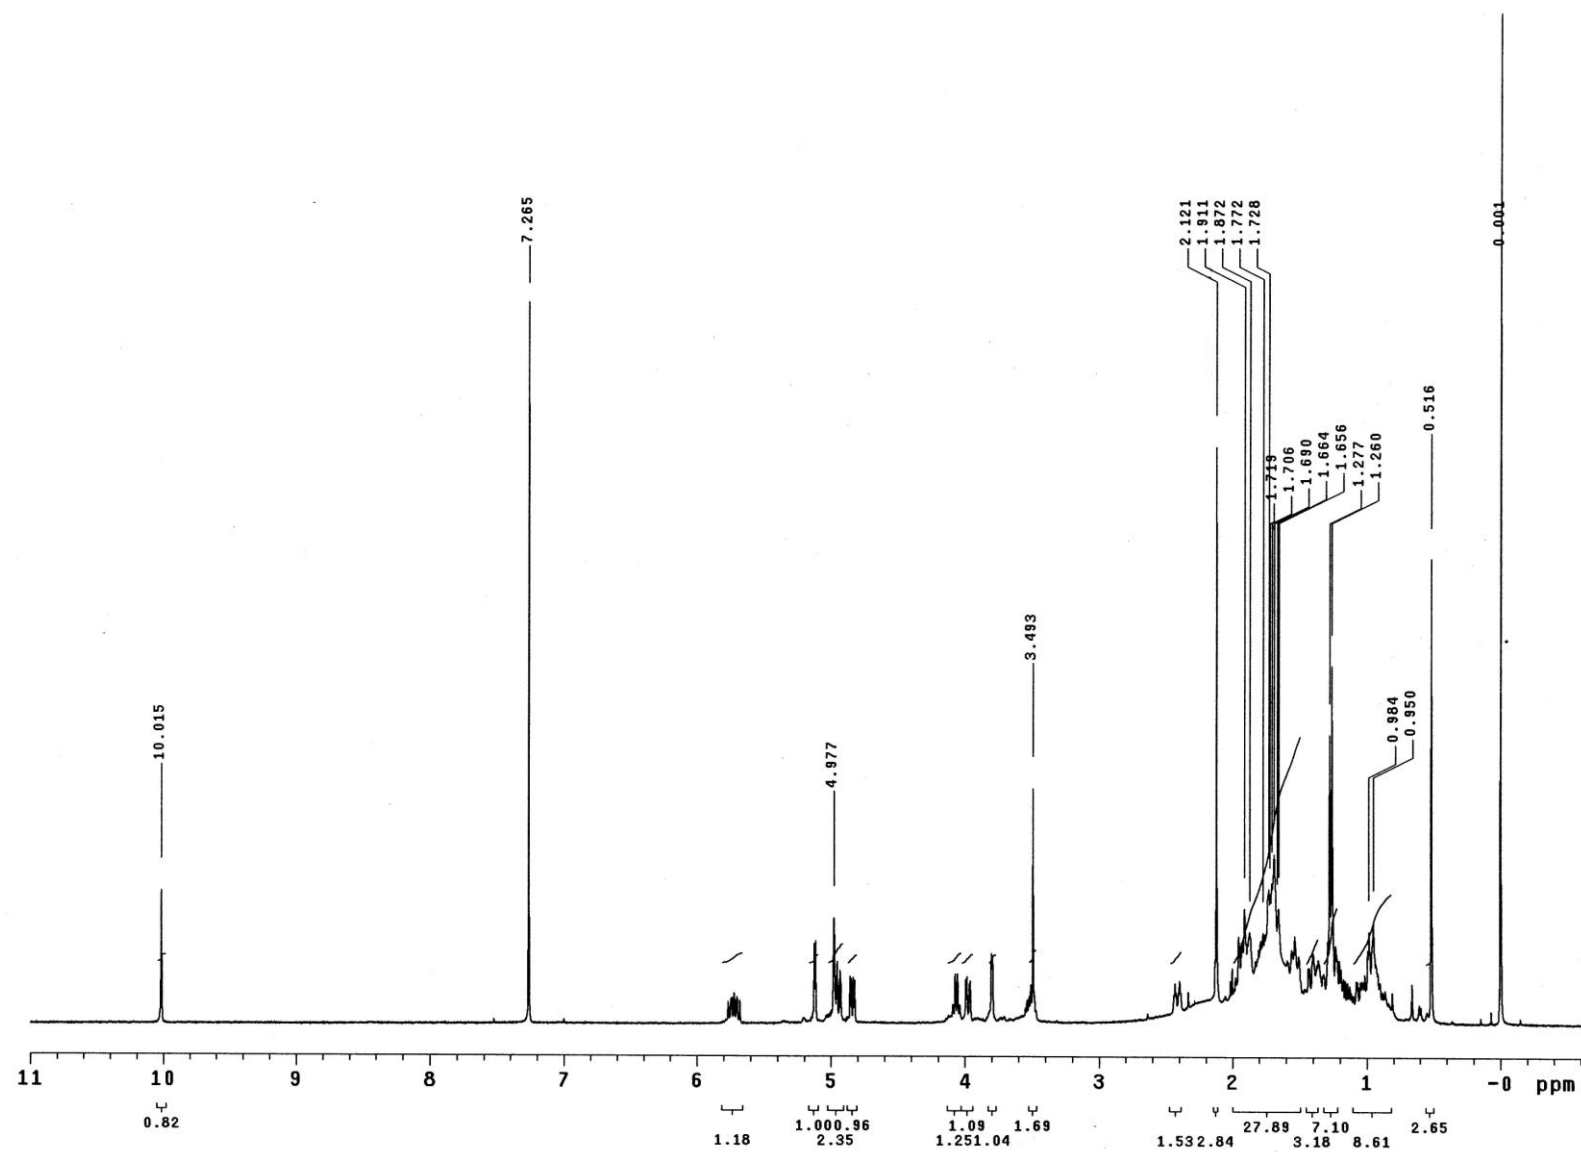

Figure S14.  $^{13}\text{C}$  NMR spectrum of **5** in  $\text{CDCl}_3$  at 100 MHz.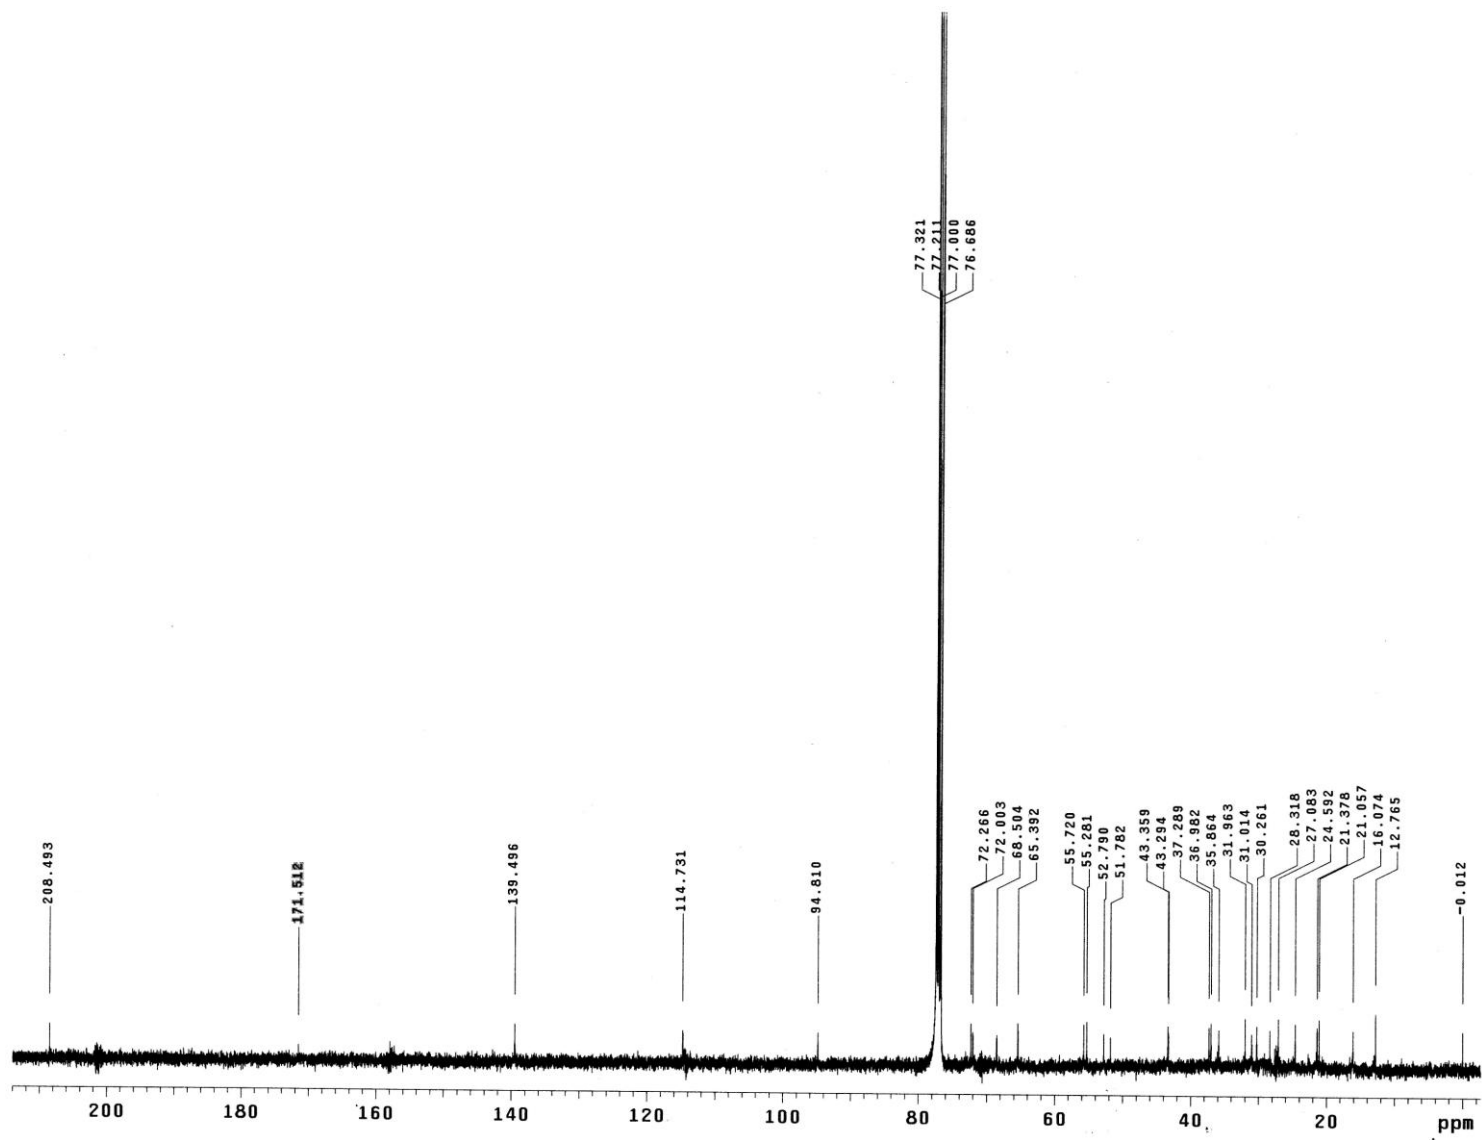

Figure S15. HRESIMS spectrum of 5.

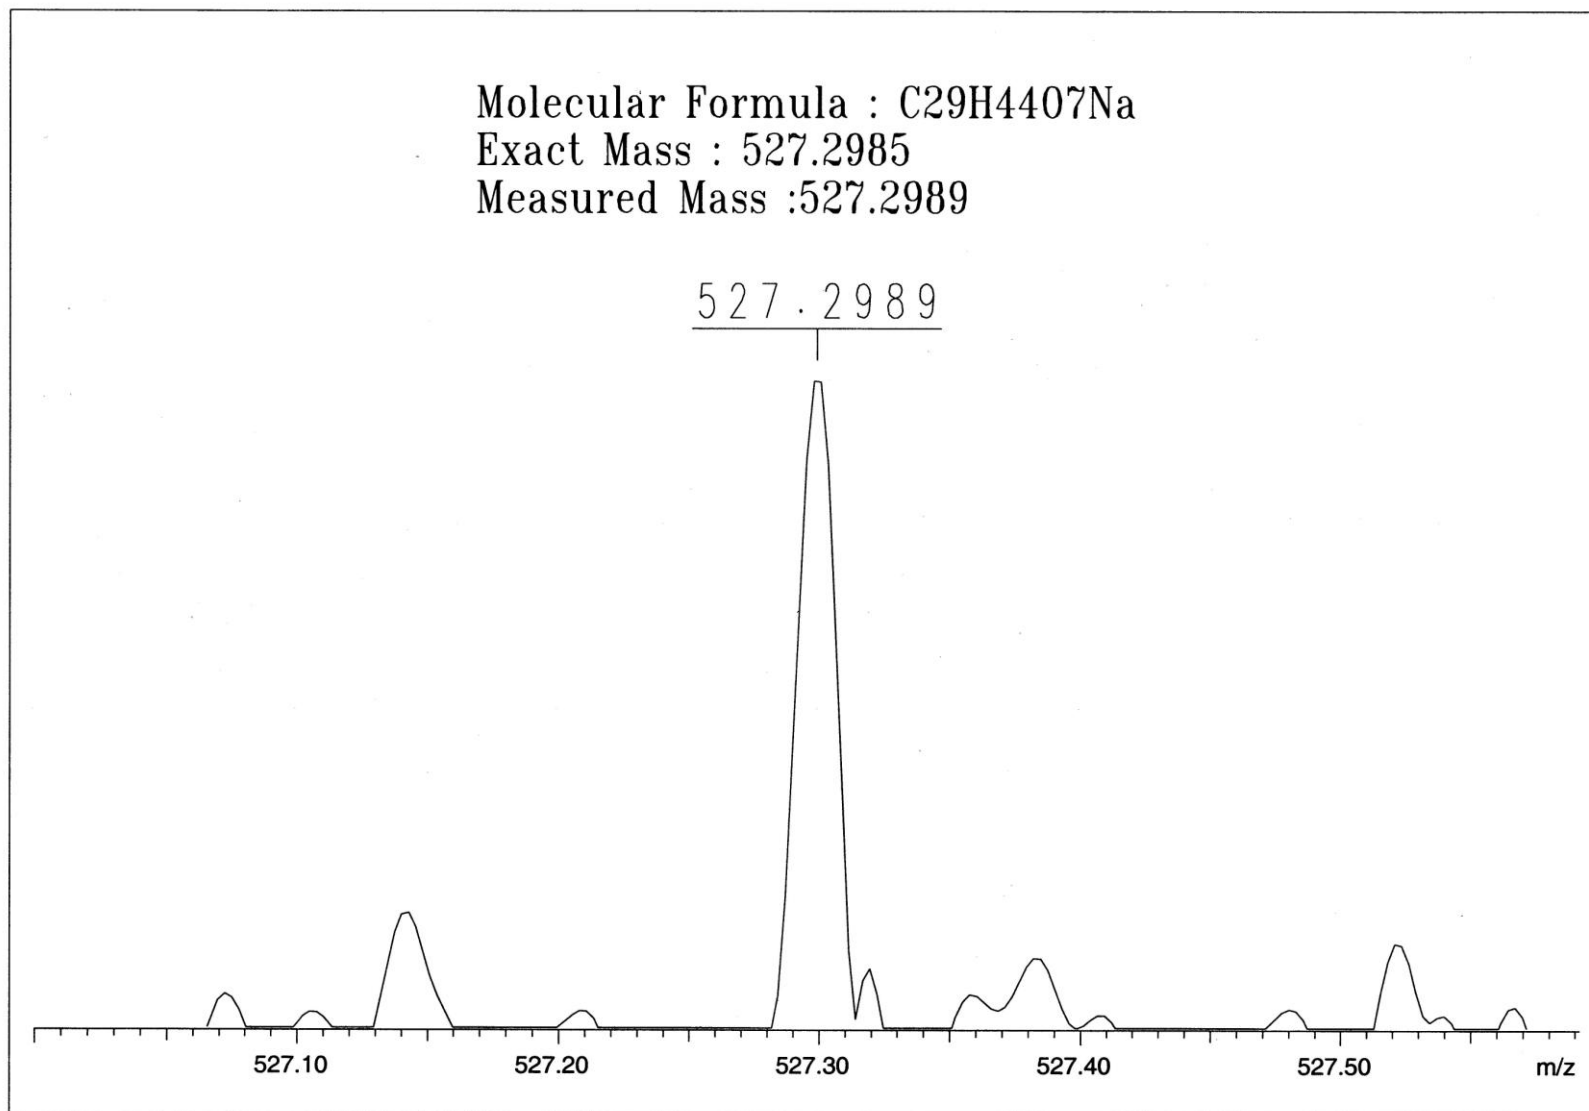



**Figure S16.**  $^1\text{H}$  NMR spectrum of **6** in  $\text{CDCl}_3$  at 400 MHz.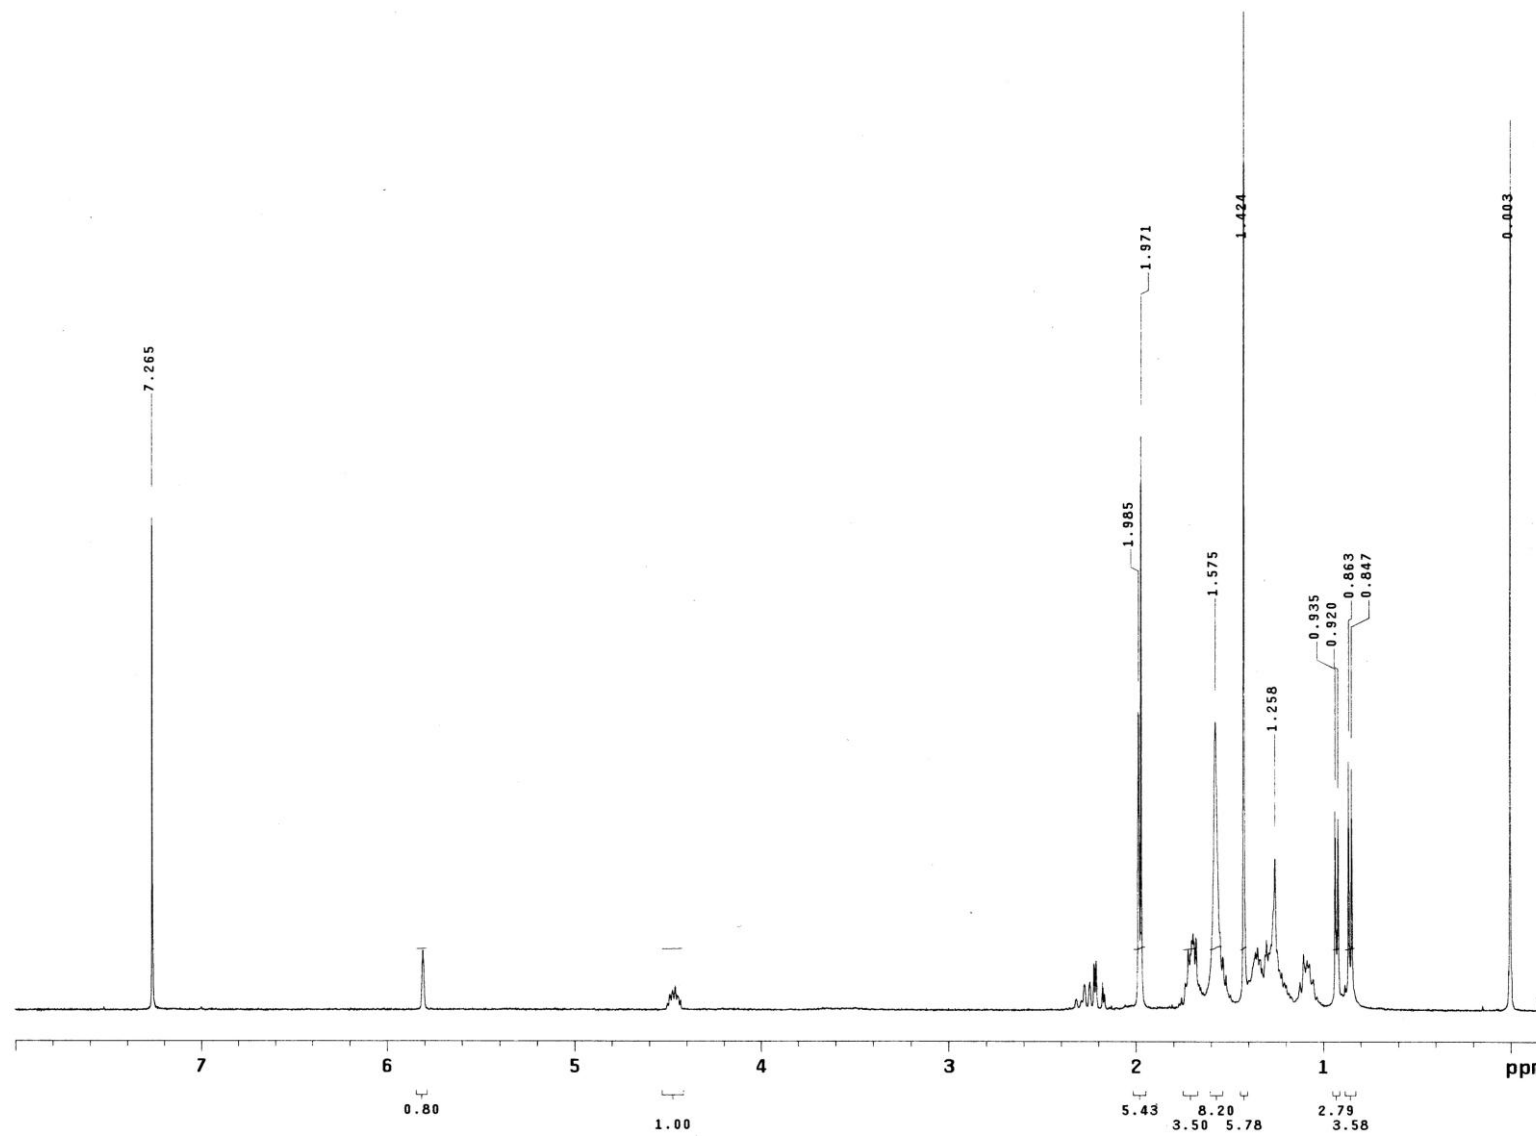

Figure S17.  $^{13}\text{C}$  NMR spectrum of **6** in  $\text{CDCl}_3$  at 100 MHz.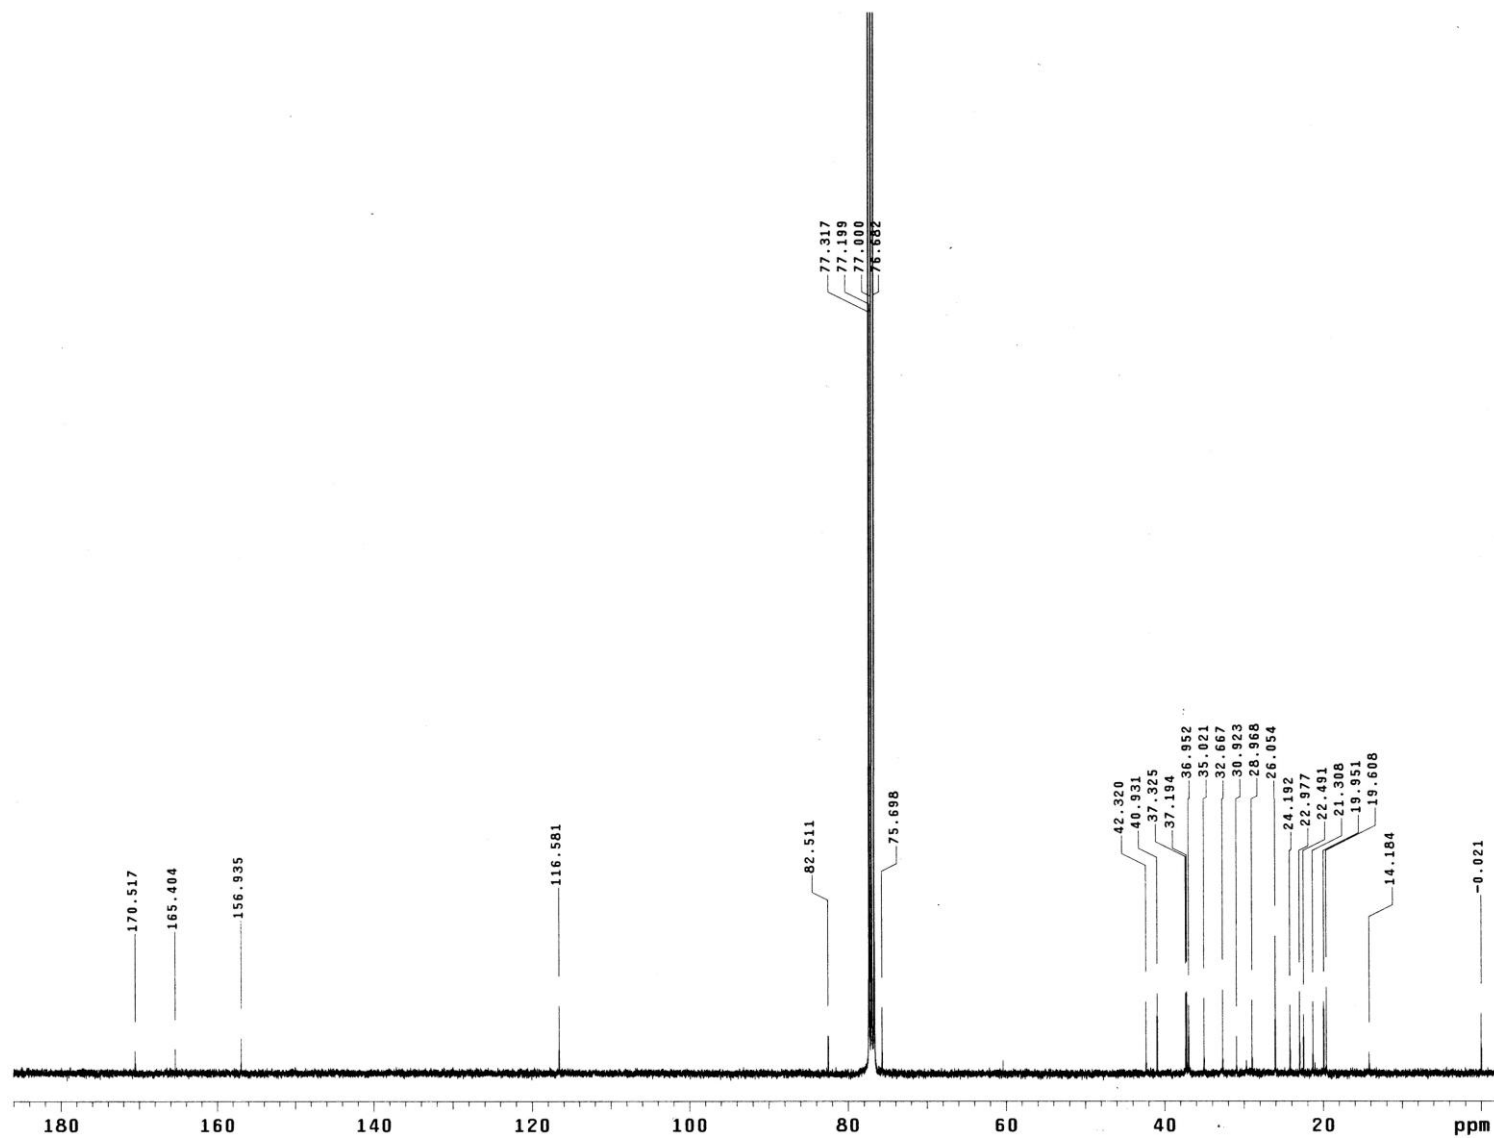

Figure S18. HRESIMS spectrum of 6.

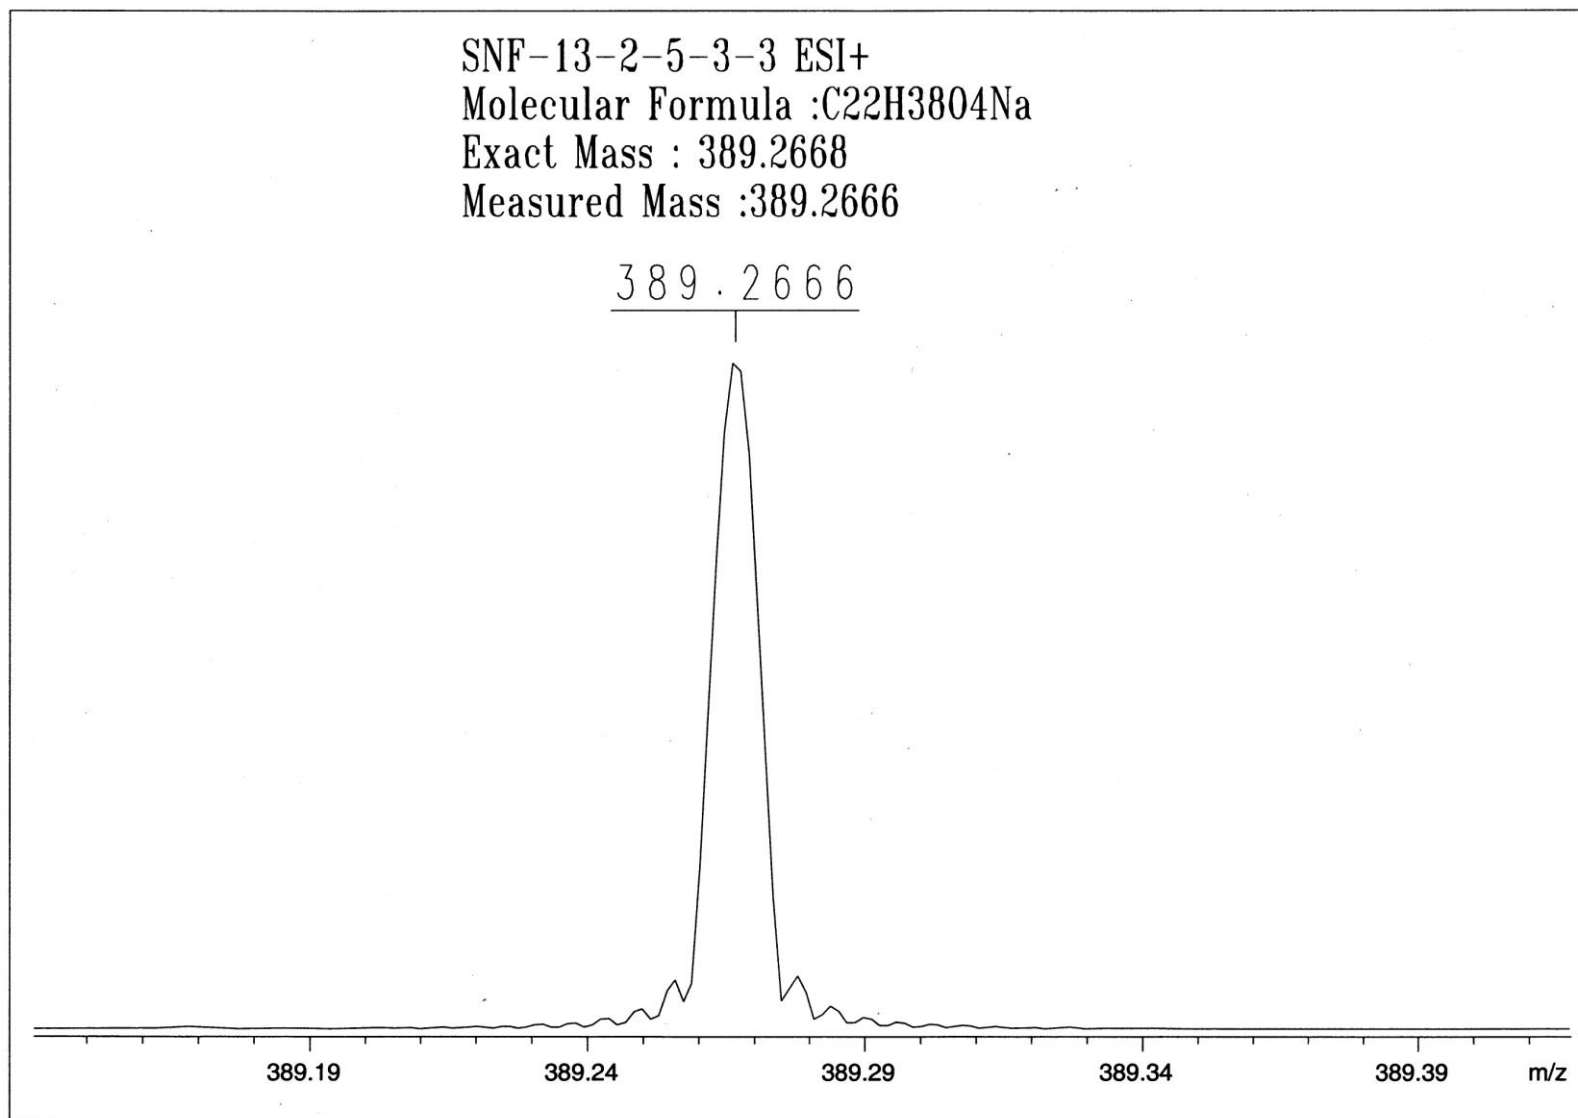

Supplement: marinedrugs-11-01853-s001.pdf [file marinedrugs-11-01853-s001.pdf]
