# Supplementary material for: Cytotoxic and Anti-Inflammatory Metabolites from the Soft Coral Scleronephthya gracillimum
Source: MDPI journal article supplement (doi:10.3390/md11061853), 2013-05-29
Supplement: s2 [file s2]

marinedrugs-11-01853-s001.mol
  corina  04141422083D 1   1.00000     0.00000 
CORINA 3.49 0023  12.04.2013
 33 36  0  0  0  0  0  0  0  0999 V2000
    0.2354    1.6647    0.2082 C   0  0  0  0  0  0  0  0  0  0  0  0
    0.1575    0.1529   -0.0145 C   0  0  0  0  0  0  0  0  0  0  0  0
    0.7889   -0.5704    1.1769 C   0  0  0  0  0  0  0  0  0  0  0  0
    2.2536   -0.1497    1.3105 C   0  0  0  0  0  0  0  0  0  0  0  0
    2.3330    1.3622    1.5326 C   0  0  0  0  0  0  0  0  0  0  0  0
    1.7000    2.0858    0.3422 C   0  0  0  0  0  0  0  0  0  0  0  0
    2.8871   -0.8755    2.4988 C   0  0  0  0  0  0  0  0  0  0  0  0
    4.3519   -0.4541    2.6334 C   0  0  0  0  0  0  0  0  0  0  0  0
    4.4279    1.0562    2.8620 C   0  0  0  0  0  0  0  0  0  0  0  0
    3.7983    1.7803    1.6619 C   0  0  0  0  0  0  0  0  0  0  0  0
    5.8746    1.5048    2.9489 C   0  0  0  0  0  0  0  0  0  0  0  0
    5.8600    3.0247    3.2665 C   0  0  0  0  0  0  0  0  0  0  0  0
    5.3527    3.7418    2.0309 C   0  0  0  0  0  0  0  0  0  0  0  0
    3.8982    3.2950    1.8068 C   0  0  0  0  0  0  0  0  0  0  0  0
    6.6777    0.9491    4.1298 C   0  0  0  0  0  0  0  0  0  0  0  0
    7.8219    1.9870    4.2909 C   0  0  0  0  0  0  0  0  0  0  0  0
    7.3007    3.3105    3.6773 C   0  0  0  0  0  0  0  0  0  0  0  0
    1.5805    1.7303    2.8129 C   0  0  0  0  0  0  0  0  0  0  0  0
    2.7909   -0.4113    0.3989 H   0  0  0  0  0  0  0  0  0  0  0  0
    4.3292    1.4880    0.7559 H   0  0  0  0  0  0  0  0  0  0  0  0
    6.3868    1.3174    2.0052 H   0  0  0  0  0  0  0  0  0  0  0  0
    3.8905    1.3180    3.7734 H   0  0  0  0  0  0  0  0  0  0  0  0
    4.9227    3.2980    4.4444 C   0  0  0  0  0  0  0  0  0  0  0  0
    7.3421    4.4136    4.7033 C   0  0  0  0  0  0  0  0  0  0  0  0
    8.0409    5.4972    4.4721 C   0  0  0  0  0  0  0  0  0  0  0  0
   -1.2105   -0.2404   -0.1402 O   0  0  0  0  0  0  0  0  0  0  0  0
   -1.3912   -1.6206   -0.4630 C   0  0  0  0  0  0  0  0  0  0  0  0
    1.5285    3.1753    2.9452 O   0  0  0  0  0  0  0  0  0  0  0  0
    0.4056    2.9133    4.8304 O   0  0  0  0  0  0  0  0  0  0  0  0
    0.8979    3.6662    4.0237 C   0  0  0  0  0  0  0  0  0  0  0  0
    0.8038    5.1563    4.2283 C   0  0  0  0  0  0  0  0  0  0  0  0
    0.8636   -0.1898   -1.2086 O   0  0  0  0  0  0  0  0  0  0  0  0
    0.3540    0.4394   -2.3861 C   0  0  0  0  0  0  0  0  0  0  0  0
  1  2  1  0      
  2  3  1  0      
  3  4  1  0      
  4  5  1  0      
  5  6  1  0      
  6  1  1  0      
  4  7  1  0      
  7  8  1  0      
  8  9  1  0      
  9 10  1  0      
 10  5  1  0      
  9 11  1  0      
 11 12  1  0      
 12 13  1  0      
 13 14  1  0      
 14 10  1  0      
 11 15  1  0      
 15 16  1  0      
 16 17  1  0      
 17 12  1  0      
  5 18  1  0      
  4 19  1  0      
 10 20  1  0      
 11 21  1  0      
  9 22  1  0      
 12 23  1  0      
 17 24  1  0      
 24 25  2  0      
  2 26  1  0      
 26 27  1  0      
 18 28  1  0      
 28 30  1  0      
 29 30  2  0      
 30 31  1  0      
  2 32  1  0      
 32 33  1  0      
M  STY  1   1 SUP
M  SLB  1   1   1
M  SAL   1  2  26  27
M  SBL   1  1  29
M  SMT   1 OCH3
M  SBV   1 29   -7.3800    6.4623
M  STY  1   2 SUP
M  SLB  1   2   2
M  SAL   2  4  28  29  30  31
M  SBL   2  1  31
M  SMT   2 OAc
M  SBV   2 31   -7.3803    6.4623
M  STY  1   3 SUP
M  SLB  1   3   3
M  SAL   3  2  32  33
M  SBL   3  1  35
M  SMT   3 OCH3
M  SBV   3 35   -7.0227    7.0811
M  END
$$$$
