# Supplementary material for: Cytotoxic and Anti-Inflammatory Metabolites from the Soft Coral Scleronephthya gracillimum
Source: MDPI journal article supplement (doi:10.3390/md11061853), 2013-05-29
Supplement: s3 [file s3]

marinedrugs-11-01853-s001.mol
  ChemDraw01301415042D

 33 36  0  0  0  0  0  0  0  0999 V2000
   -2.3258   -0.4264    0.0000 C   0  0  0  0  0  0  0  0  0  0  0  0
   -2.3258   -1.2514    0.0000 C   0  0  0  0  0  0  0  0  0  0  0  0
   -1.6113   -1.6639    0.0000 C   0  0  0  0  0  0  0  0  0  0  0  0
   -0.8968   -1.2514    0.0000 C   0  0  0  0  0  0  0  0  0  0  0  0
   -0.8968   -0.4264    0.0000 C   0  0  0  0  0  0  0  0  0  0  0  0
   -1.6113   -0.0139    0.0000 C   0  0  0  0  0  0  0  0  0  0  0  0
   -0.1824   -1.6639    0.0000 C   0  0  0  0  0  0  0  0  0  0  0  0
    0.5321   -1.2514    0.0000 C   0  0  0  0  0  0  0  0  0  0  0  0
    0.5321   -0.4264    0.0000 C   0  0  0  0  0  0  0  0  0  0  0  0
   -0.1824   -0.0139    0.0000 C   0  0  0  0  0  0  0  0  0  0  0  0
    1.2466   -0.0139    0.0000 C   0  0  0  0  0  0  0  0  0  0  0  0
    1.2466    0.8111    0.0000 C   0  0  0  0  0  0  0  0  0  0  0  0
    0.5321    1.2236    0.0000 C   0  0  0  0  0  0  0  0  0  0  0  0
   -0.1824    0.8111    0.0000 C   0  0  0  0  0  0  0  0  0  0  0  0
    2.0312   -0.2689    0.0000 C   0  0  0  0  0  0  0  0  0  0  0  0
    2.5161    0.3986    0.0000 C   0  0  0  0  0  0  0  0  0  0  0  0
    2.0312    1.0660    0.0000 C   0  0  0  0  0  0  0  0  0  0  0  0
   -0.8968    0.3986    0.0000 C   0  0  0  0  0  0  0  0  0  0  0  0
   -0.8968   -2.0764    0.0000 H   0  0  0  0  0  0  0  0  0  0  0  0
   -0.1824   -0.8389    0.0000 H   0  0  0  0  0  0  0  0  0  0  0  0
    1.2466   -0.8389    0.0000 H   0  0  0  0  0  0  0  0  0  0  0  0
    0.5321    0.3986    0.0000 H   0  0  0  0  0  0  0  0  0  0  0  0
    1.2466    1.6361    0.0000 C   0  0  0  0  0  0  0  0  0  0  0  0
    2.2447    1.8629    0.0000 C   0  0  0  0  0  0  0  0  0  0  0  0
    3.0416    2.0764    0.0000 C   0  0  0  0  0  0  0  0  0  0  0  0
   -3.0413   -1.2514    0.0000 O   0  0  0  0  0  0  0  0  0  0  0  0
   -2.3268   -1.6639    0.0000 C   0  0  0  0  0  0  0  0  0  0  0  0
   -1.6127    0.3986    0.0000 O   0  0  0  0  0  0  0  0  0  0  0  0
   -2.3271    1.6361    0.0000 O   0  0  0  0  0  0  0  0  0  0  0  0
   -2.3271    0.8111    0.0000 C   0  0  0  0  0  0  0  0  0  0  0  0
   -3.0416    0.3986    0.0000 C   0  0  0  0  0  0  0  0  0  0  0  0
   -2.6841   -0.6327    0.0000 O   0  0  0  0  0  0  0  0  0  0  0  0
   -1.9696   -1.0452    0.0000 C   0  0  0  0  0  0  0  0  0  0  0  0
  1  2  1  0      
  2  3  1  0      
  3  4  1  0      
  4  5  1  0      
  5  6  1  0      
  6  1  1  0      
  4  7  1  0      
  7  8  1  0      
  8  9  1  0      
  9 10  1  0      
 10  5  1  0      
  9 11  1  0      
 11 12  1  0      
 12 13  1  0      
 13 14  1  0      
 14 10  1  0      
 11 15  1  0      
 15 16  1  0      
 16 17  1  0      
 17 12  1  0      
  5 18  1  1      
  4 19  1  6      
 10 20  1  6      
 11 21  1  6      
  9 22  1  1      
 12 23  1  1      
 17 24  1  1      
 24 25  2  0      
  2 26  1  0      
 26 27  1  0      
 18 28  1  0      
 28 30  1  0      
 29 30  2  0      
 30 31  1  0      
  2 32  1  0      
 32 33  1  0      
M  STY  1   1 SUP
M  SLB  1   1   1
M  SAL   1  2  26  27
M  SBL   1  1  29
M  SMT   1 OCH3
M  SBV   1 29   -7.3800    6.4623
M  STY  1   2 SUP
M  SLB  1   2   2
M  SAL   2  4  28  29  30  31
M  SBL   2  1  31
M  SMT   2 OAc
M  SBV   2 31   -7.3803    6.4623
M  STY  1   3 SUP
M  SLB  1   3   3
M  SAL   3  2  32  33
M  SBL   3  1  35
M  SMT   3 OCH3
M  SBV   3 35   -7.0227    7.0811
M  END
