# Supplementary material for: Cytotoxic and Anti-Inflammatory Metabolites from the Soft Coral Scleronephthya gracillimum
Source: MDPI journal article supplement (doi:10.3390/md11061853), 2013-05-29
Supplement: s4 [file s4]

marinedrugs-11-01853-s002.mol
  corina  04141422083D 1   1.00000     0.00000 
CORINA 3.49 0023  12.04.2013
 29 32  0  0  0  0  0  0  0  0999 V2000
   -0.0133    1.6003    0.0104 C   0  0  0  0  0  0  0  0  0  0  0  0
   -0.0149    0.0848    0.0733 C   0  0  0  0  0  0  0  0  0  0  0  0
    0.7805   -0.6065   -0.9508 C   0  0  0  0  0  0  0  0  0  0  0  0
    1.7970    0.0342   -1.5223 C   0  0  0  0  0  0  0  0  0  0  0  0
    2.2163    1.4240   -1.1571 C   0  0  0  0  0  0  0  0  0  0  0  0
    1.4441    2.0592   -0.0271 C   0  0  0  0  0  0  0  0  0  0  0  0
    2.5611   -0.6566   -2.6391 C   0  0  0  0  0  0  0  0  0  0  0  0
    2.5554    0.2763   -3.8555 C   0  0  0  0  0  0  0  0  0  0  0  0
    3.1216    1.6424   -3.4670 C   0  0  0  0  0  0  0  0  0  0  0  0
    2.2182    2.3005   -2.4104 C   0  0  0  0  0  0  0  0  0  0  0  0
    3.1469    2.5576   -4.6772 C   0  0  0  0  0  0  0  0  0  0  0  0
    3.8183    3.8851   -4.2335 C   0  0  0  0  0  0  0  0  0  0  0  0
    2.8510    4.5871   -3.3000 C   0  0  0  0  0  0  0  0  0  0  0  0
    2.7010    3.7024   -2.0518 C   0  0  0  0  0  0  0  0  0  0  0  0
    4.0600    2.1174   -5.8270 C   0  0  0  0  0  0  0  0  0  0  0  0
    4.3333    3.4466   -6.5825 C   0  0  0  0  0  0  0  0  0  0  0  0
    4.1183    4.5855   -5.5547 C   0  0  0  0  0  0  0  0  0  0  0  0
    3.6743    1.3374   -0.7013 C   0  0  0  0  0  0  0  0  0  0  0  0
    1.2028    2.3720   -2.8002 H   0  0  0  0  0  0  0  0  0  0  0  0
    2.1334    2.7436   -5.0327 H   0  0  0  0  0  0  0  0  0  0  0  0
    4.1276    1.5214   -3.0652 H   0  0  0  0  0  0  0  0  0  0  0  0
    5.1242    3.5840   -3.4954 C   0  0  0  0  0  0  0  0  0  0  0  0
    5.3670    5.4202   -5.4315 C   0  0  0  0  0  0  0  0  0  0  0  0
    5.3238    6.7047   -5.6849 C   0  0  0  0  0  0  0  0  0  0  0  0
   -0.6367   -0.5216    0.9205 O   0  0  0  0  0  0  0  0  0  0  0  0
    3.7642    0.4914    0.4753 O   0  0  0  0  0  0  0  0  0  0  0  0
    5.9458    0.8423    0.5009 O   0  0  0  0  0  0  0  0  0  0  0  0
    4.9845    0.3110    1.0044 C   0  0  0  0  0  0  0  0  0  0  0  0
    5.1557   -0.5543    2.2263 C   0  0  0  0  0  0  0  0  0  0  0  0
  1  2  1  0      
  2  3  1  0      
  3  4  2  0      
  4  5  1  0      
  5  6  1  0      
  6  1  1  0      
  4  7  1  0      
  7  8  1  0      
  8  9  1  0      
  9 10  1  0      
 10  5  1  0      
  9 11  1  0      
 11 12  1  0      
 12 13  1  0      
 13 14  1  0      
 14 10  1  0      
 11 15  1  0      
 15 16  1  0      
 16 17  1  0      
 17 12  1  0      
  5 18  1  0      
 10 19  1  0      
 11 20  1  0      
  9 21  1  0      
 12 22  1  0      
 17 23  1  0      
 23 24  2  0      
  2 25  2  0      
 18 26  1  0      
 26 28  1  0      
 27 28  2  0      
 28 29  1  0      
M  STY  1   1 SUP
M  SLB  1   1   1
M  SAL   1  4  26  27  28  29
M  SBL   1  1  29
M  SMT   1 OAc
M  SBV   1 29   -7.1946    5.8023
M  END
$$$$
