# Supplementary material for: Cytotoxic and Anti-Inflammatory Metabolites from the Soft Coral Scleronephthya gracillimum
Source: MDPI journal article supplement (doi:10.3390/md11061853), 2013-05-29
Supplement: s5 [file s5]

marinedrugs-11-01853-s002.mol
  ChemDraw01301415042D

 29 32  0  0  0  0  0  0  0  0999 V2000
   -2.3258   -0.6327    0.0000 C   0  0  0  0  0  0  0  0  0  0  0  0
   -2.3258   -1.4577    0.0000 C   0  0  0  0  0  0  0  0  0  0  0  0
   -1.6113   -1.8702    0.0000 C   0  0  0  0  0  0  0  0  0  0  0  0
   -0.8968   -1.4577    0.0000 C   0  0  0  0  0  0  0  0  0  0  0  0
   -0.8968   -0.6327    0.0000 C   0  0  0  0  0  0  0  0  0  0  0  0
   -1.6113   -0.2202    0.0000 C   0  0  0  0  0  0  0  0  0  0  0  0
   -0.1824   -1.8702    0.0000 C   0  0  0  0  0  0  0  0  0  0  0  0
    0.5321   -1.4577    0.0000 C   0  0  0  0  0  0  0  0  0  0  0  0
    0.5321   -0.6327    0.0000 C   0  0  0  0  0  0  0  0  0  0  0  0
   -0.1824   -0.2202    0.0000 C   0  0  0  0  0  0  0  0  0  0  0  0
    1.2466   -0.2202    0.0000 C   0  0  0  0  0  0  0  0  0  0  0  0
    1.2466    0.6048    0.0000 C   0  0  0  0  0  0  0  0  0  0  0  0
    0.5321    1.0173    0.0000 C   0  0  0  0  0  0  0  0  0  0  0  0
   -0.1824    0.6048    0.0000 C   0  0  0  0  0  0  0  0  0  0  0  0
    2.0312   -0.4751    0.0000 C   0  0  0  0  0  0  0  0  0  0  0  0
    2.5161    0.1923    0.0000 C   0  0  0  0  0  0  0  0  0  0  0  0
    2.0312    0.8598    0.0000 C   0  0  0  0  0  0  0  0  0  0  0  0
   -0.8968    0.1923    0.0000 C   0  0  0  0  0  0  0  0  0  0  0  0
   -0.1824   -1.0452    0.0000 H   0  0  0  0  0  0  0  0  0  0  0  0
    1.2466   -1.0452    0.0000 H   0  0  0  0  0  0  0  0  0  0  0  0
    0.5321    0.1923    0.0000 H   0  0  0  0  0  0  0  0  0  0  0  0
    1.2466    1.4298    0.0000 C   0  0  0  0  0  0  0  0  0  0  0  0
    2.2447    1.6567    0.0000 C   0  0  0  0  0  0  0  0  0  0  0  0
    3.0416    1.8702    0.0000 C   0  0  0  0  0  0  0  0  0  0  0  0
   -3.0402   -1.8702    0.0000 O   0  0  0  0  0  0  0  0  0  0  0  0
   -1.6127    0.1923    0.0000 O   0  0  0  0  0  0  0  0  0  0  0  0
   -2.3271    1.4298    0.0000 O   0  0  0  0  0  0  0  0  0  0  0  0
   -2.3271    0.6048    0.0000 C   0  0  0  0  0  0  0  0  0  0  0  0
   -3.0416    0.1923    0.0000 C   0  0  0  0  0  0  0  0  0  0  0  0
  1  2  1  0      
  2  3  1  0      
  3  4  2  0      
  4  5  1  0      
  5  6  1  0      
  6  1  1  0      
  4  7  1  0      
  7  8  1  0      
  8  9  1  0      
  9 10  1  0      
 10  5  1  0      
  9 11  1  0      
 11 12  1  0      
 12 13  1  0      
 13 14  1  0      
 14 10  1  0      
 11 15  1  0      
 15 16  1  0      
 16 17  1  0      
 17 12  1  0      
  5 18  1  1      
 10 19  1  6      
 11 20  1  6      
  9 21  1  1      
 12 22  1  1      
 17 23  1  1      
 23 24  2  0      
  2 25  2  0      
 18 26  1  0      
 26 28  1  0      
 27 28  2  0      
 28 29  1  0      
M  STY  1   1 SUP
M  SLB  1   1   1
M  SAL   1  4  26  27  28  29
M  SBL   1  1  29
M  SMT   1 OAc
M  SBV   1 29   -7.1946    5.8023
M  END
