# Supplementary material for: Cytotoxic and Anti-Inflammatory Metabolites from the Soft Coral Scleronephthya gracillimum
Source: MDPI journal article supplement (doi:10.3390/md11061853), 2013-05-29
Supplement: s6 [file s6]

marinedrugs-11-01853-s003.mol
  corina  04141422083D 1   1.00000     0.00000 
CORINA 3.49 0023  12.04.2013
 30 33  0  0  0  0  0  0  0  0999 V2000
   -0.0187    1.5258    0.0104 C   0  0  0  0  0  0  0  0  0  0  0  0
    0.0021   -0.0041    0.0020 C   0  0  0  0  0  0  0  0  0  0  0  0
    0.7416   -0.5101    1.2423 C   0  0  0  0  0  0  0  0  0  0  0  0
    2.1769    0.0191    1.2310 C   0  0  0  0  0  0  0  0  0  0  0  0
    2.1577    1.5491    1.2388 C   0  0  0  0  0  0  0  0  0  0  0  0
    1.4165    2.0555   -0.0004 C   0  0  0  0  0  0  0  0  0  0  0  0
    2.9185   -0.4897    2.4684 C   0  0  0  0  0  0  0  0  0  0  0  0
    4.3539    0.0404    2.4580 C   0  0  0  0  0  0  0  0  0  0  0  0
    4.3317    1.5694    2.4727 C   0  0  0  0  0  0  0  0  0  0  0  0
    3.5935    2.0752    1.2236 C   0  0  0  0  0  0  0  0  0  0  0  0
    5.7447    2.1185    2.4124 C   0  0  0  0  0  0  0  0  0  0  0  0
    5.6360    3.6638    2.5191 C   0  0  0  0  0  0  0  0  0  0  0  0
    5.0184    4.1656    1.2287 C   0  0  0  0  0  0  0  0  0  0  0  0
    3.5907    3.5985    1.1534 C   0  0  0  0  0  0  0  0  0  0  0  0
    6.6428    1.7877    3.6093 C   0  0  0  0  0  0  0  0  0  0  0  0
    7.7155    2.9098    3.5594 C   0  0  0  0  0  0  0  0  0  0  0  0
    7.0707    4.0972    2.8018 C   0  0  0  0  0  0  0  0  0  0  0  0
    1.4441    2.0443    2.4984 C   0  0  0  0  0  0  0  0  0  0  0  0
    4.0991    1.6933    0.3366 H   0  0  0  0  0  0  0  0  0  0  0  0
    6.2224    1.8337    1.4750 H   0  0  0  0  0  0  0  0  0  0  0  0
    3.8221    1.9216    3.3695 H   0  0  0  0  0  0  0  0  0  0  0  0
    4.7402    4.0390    3.7013 C   0  0  0  0  0  0  0  0  0  0  0  0
    7.0824    5.3341    3.6628 C   0  0  0  0  0  0  0  0  0  0  0  0
    7.6890    6.4173    3.2448 C   0  0  0  0  0  0  0  0  0  0  0  0
    1.3968    3.4844    0.0073 O   0  0  0  0  0  0  0  0  0  0  0  0
    2.6864   -0.3329    0.3339 H   0  0  0  0  0  0  0  0  0  0  0  0
   -1.3601   -0.5068    0.0118 O   0  0  0  0  0  0  0  0  0  0  0  0
   -1.3347   -0.4781   -2.1977 O   0  0  0  0  0  0  0  0  0  0  0  0
   -1.9428   -0.7113   -1.1800 C   0  0  0  0  0  0  0  0  0  0  0  0
   -3.3553   -1.2320   -1.2487 C   0  0  0  0  0  0  0  0  0  0  0  0
  1  2  1  0      
  2  3  1  0      
  3  4  1  0      
  4  5  1  0      
  5  6  1  0      
  6  1  1  0      
  4  7  1  0      
  7  8  1  0      
  8  9  1  0      
  9 10  1  0      
 10  5  1  0      
  9 11  1  0      
 11 12  1  0      
 12 13  1  0      
 13 14  1  0      
 14 10  1  0      
 11 15  1  0      
 15 16  1  0      
 16 17  1  0      
 17 12  1  0      
  5 18  1  0      
 10 19  1  0      
 11 20  1  0      
  9 21  1  0      
 12 22  1  0      
 17 23  1  0      
 23 24  2  0      
  6 25  1  0      
  4 26  1  0      
  2 27  1  0      
 27 29  1  0      
 28 29  2  0      
 29 30  1  0      
M  STY  1   1 SUP
M  SLB  1   1   1
M  SAL   1  4  27  28  29  30
M  SBL   1  1  30
M  SMT   1 OAc
M  SBV   1 30   -6.2119    6.3179
M  END
$$$$
