# Supplementary material for: Cytotoxic and Anti-Inflammatory Metabolites from the Soft Coral Scleronephthya gracillimum
Source: MDPI journal article supplement (doi:10.3390/md11061853), 2013-05-29
Supplement: s7 [file s7]

marinedrugs-11-01853-s003.mol
  ChemDraw01301415052D

 30 33  0  0  0  0  0  0  0  0999 V2000
   -1.6115   -0.4264    0.0000 C   0  0  0  0  0  0  0  0  0  0  0  0
   -1.6115   -1.2514    0.0000 C   0  0  0  0  0  0  0  0  0  0  0  0
   -0.8970   -1.6639    0.0000 C   0  0  0  0  0  0  0  0  0  0  0  0
   -0.1825   -1.2514    0.0000 C   0  0  0  0  0  0  0  0  0  0  0  0
   -0.1825   -0.4264    0.0000 C   0  0  0  0  0  0  0  0  0  0  0  0
   -0.8970   -0.0139    0.0000 C   0  0  0  0  0  0  0  0  0  0  0  0
    0.5320   -1.6639    0.0000 C   0  0  0  0  0  0  0  0  0  0  0  0
    1.2464   -1.2514    0.0000 C   0  0  0  0  0  0  0  0  0  0  0  0
    1.2464   -0.4264    0.0000 C   0  0  0  0  0  0  0  0  0  0  0  0
    0.5320   -0.0139    0.0000 C   0  0  0  0  0  0  0  0  0  0  0  0
    1.9609   -0.0139    0.0000 C   0  0  0  0  0  0  0  0  0  0  0  0
    1.9609    0.8111    0.0000 C   0  0  0  0  0  0  0  0  0  0  0  0
    1.2464    1.2236    0.0000 C   0  0  0  0  0  0  0  0  0  0  0  0
    0.5320    0.8111    0.0000 C   0  0  0  0  0  0  0  0  0  0  0  0
    2.7455   -0.2689    0.0000 C   0  0  0  0  0  0  0  0  0  0  0  0
    3.2304    0.3986    0.0000 C   0  0  0  0  0  0  0  0  0  0  0  0
    2.7455    1.0660    0.0000 C   0  0  0  0  0  0  0  0  0  0  0  0
   -0.1825    0.3986    0.0000 C   0  0  0  0  0  0  0  0  0  0  0  0
    0.5320   -0.8389    0.0000 H   0  0  0  0  0  0  0  0  0  0  0  0
    1.9609   -0.8389    0.0000 H   0  0  0  0  0  0  0  0  0  0  0  0
    1.2464    0.3986    0.0000 H   0  0  0  0  0  0  0  0  0  0  0  0
    1.9609    1.6361    0.0000 C   0  0  0  0  0  0  0  0  0  0  0  0
    2.9590    1.8629    0.0000 C   0  0  0  0  0  0  0  0  0  0  0  0
    3.7559    2.0764    0.0000 C   0  0  0  0  0  0  0  0  0  0  0  0
   -0.8970    0.8111    0.0000 O   0  0  0  0  0  0  0  0  0  0  0  0
   -0.1825   -2.0764    0.0000 H   0  0  0  0  0  0  0  0  0  0  0  0
   -2.3270   -1.6639    0.0000 O   0  0  0  0  0  0  0  0  0  0  0  0
   -3.0415   -0.4264    0.0000 O   0  0  0  0  0  0  0  0  0  0  0  0
   -3.0415   -1.2514    0.0000 C   0  0  0  0  0  0  0  0  0  0  0  0
   -3.7559   -1.6639    0.0000 C   0  0  0  0  0  0  0  0  0  0  0  0
  1  2  1  0      
  2  3  1  0      
  3  4  1  0      
  4  5  1  0      
  5  6  1  0      
  6  1  1  0      
  4  7  1  0      
  7  8  1  0      
  8  9  1  0      
  9 10  1  0      
 10  5  1  0      
  9 11  1  0      
 11 12  1  0      
 12 13  1  0      
 13 14  1  0      
 14 10  1  0      
 11 15  1  0      
 15 16  1  0      
 16 17  1  0      
 17 12  1  0      
  5 18  1  1      
 10 19  1  6      
 11 20  1  6      
  9 21  1  1      
 12 22  1  1      
 17 23  1  1      
 23 24  2  0      
  6 25  1  1      
  4 26  1  6      
  2 27  1  1      
 27 29  1  0      
 28 29  2  0      
 29 30  1  0      
M  STY  1   1 SUP
M  SLB  1   1   1
M  SAL   1  4  27  28  29  30
M  SBL   1  1  30
M  SMT   1 OAc
M  SBV   1 30   -6.2119    6.3179
M  END
