# Supplementary material for: Cytotoxic and Anti-Inflammatory Metabolites from the Soft Coral Scleronephthya gracillimum
Source: MDPI journal article supplement (doi:10.3390/md11061853), 2013-05-29
Supplement: s8 [file s8]

marinedrugs-11-01853-s004.mol
  corina  04141422093D 1   1.00000     0.00000 
CORINA 3.49 0023  12.04.2013
 43 47  0  0  0  0  0  0  0  0999 V2000
    0.1036    2.0065   -0.1093 C   0  0  0  0  0  0  0  0  0  0  0  0
   -0.1264    0.5024   -0.2698 C   0  0  0  0  0  0  0  0  0  0  0  0
    0.4266   -0.2308    0.9540 C   0  0  0  0  0  0  0  0  0  0  0  0
    1.9262    0.0450    1.0787 C   0  0  0  0  0  0  0  0  0  0  0  0
    2.1577    1.5491    1.2388 C   0  0  0  0  0  0  0  0  0  0  0  0
    1.6030    2.2828    0.0159 C   0  0  0  0  0  0  0  0  0  0  0  0
    2.4810   -0.6909    2.2997 C   0  0  0  0  0  0  0  0  0  0  0  0
    3.9807   -0.4143    2.4253 C   0  0  0  0  0  0  0  0  0  0  0  0
    4.2086    1.0887    2.5919 C   0  0  0  0  0  0  0  0  0  0  0  0
    3.6575    1.8222    1.3593 C   0  0  0  0  0  0  0  0  0  0  0  0
    5.6931    1.3923    2.6687 C   0  0  0  0  0  0  0  0  0  0  0  0
    5.8318    2.9177    2.9233 C   0  0  0  0  0  0  0  0  0  0  0  0
    5.4017    3.6304    1.6562 C   0  0  0  0  0  0  0  0  0  0  0  0
    3.9098    3.3238    1.4422 C   0  0  0  0  0  0  0  0  0  0  0  0
    6.4340    0.8079    3.8763 C   0  0  0  0  0  0  0  0  0  0  0  0
    7.6770    1.7308    4.0011 C   0  0  0  0  0  0  0  0  0  0  0  0
    7.2933    3.0735    3.3305 C   0  0  0  0  0  0  0  0  0  0  0  0
    1.4441    2.0443    2.4984 C   0  0  0  0  0  0  0  0  0  0  0  0
    4.1576    1.4404    0.4692 H   0  0  0  0  0  0  0  0  0  0  0  0
    6.1853    1.1150    1.7366 H   0  0  0  0  0  0  0  0  0  0  0  0
    3.6989    1.4412    3.4886 H   0  0  0  0  0  0  0  0  0  0  0  0
    4.9250    3.3331    4.0835 C   0  0  0  0  0  0  0  0  0  0  0  0
    7.4443    4.2085    4.3103 C   0  0  0  0  0  0  0  0  0  0  0  0
    8.2495    5.2055    4.0387 C   0  0  0  0  0  0  0  0  0  0  0  0
    2.4357   -0.3072    0.1818 H   0  0  0  0  0  0  0  0  0  0  0  0
   -1.5270    0.2443   -0.3872 O   0  0  0  0  0  0  0  0  0  0  0  0
   -2.3095    1.7092   -3.6226 C   0  0  0  0  0  0  0  0  0  0  0  0
   -3.7970    1.3595   -3.7162 C   0  0  0  0  0  0  0  0  0  0  0  0
   -4.0139   -0.0608   -3.1849 C   0  0  0  0  0  0  0  0  0  0  0  0
   -3.4866   -0.1431   -1.7492 C   0  0  0  0  0  0  0  0  0  0  0  0
   -2.0111    0.2647   -1.7316 C   0  0  0  0  0  0  0  0  0  0  0  0
   -1.8761    1.5828   -2.2668 O   0  0  0  0  0  0  0  0  0  0  0  0
   -5.4092   -0.3688   -3.2001 O   0  0  0  0  0  0  0  0  0  0  0  0
   -4.2191    1.4290   -5.0797 O   0  0  0  0  0  0  0  0  0  0  0  0
   -1.5043    0.7548   -4.5067 C   0  0  0  0  0  0  0  0  0  0  0  0
   -4.2484    0.7552   -0.9001 O   0  0  0  0  0  0  0  0  0  0  0  0
   -3.8744   -0.6100    0.7968 O   0  0  0  0  0  0  0  0  0  0  0  0
   -4.3795    0.4095    0.3902 C   0  0  0  0  0  0  0  0  0  0  0  0
   -5.1567    1.2929    1.3318 C   0  0  0  0  0  0  0  0  0  0  0  0
    1.5293    3.4923    2.5653 O   0  0  0  0  0  0  0  0  0  0  0  0
    0.3877    3.4232    4.4562 O   0  0  0  0  0  0  0  0  0  0  0  0
    0.9487    4.0888    3.6182 C   0  0  0  0  0  0  0  0  0  0  0  0
    0.9963    5.5888    3.7552 C   0  0  0  0  0  0  0  0  0  0  0  0
  1  2  1  0      
  2  3  1  0      
  3  4  1  0      
  4  5  1  0      
  5  6  1  0      
  6  1  1  0      
  4  7  1  0      
  7  8  1  0      
  8  9  1  0      
  9 10  1  0      
 10  5  1  0      
  9 11  1  0      
 11 12  1  0      
 12 13  1  0      
 13 14  1  0      
 14 10  1  0      
 11 15  1  0      
 15 16  1  0      
 16 17  1  0      
 17 12  1  0      
  5 18  1  0      
 10 19  1  0      
 11 20  1  0      
  9 21  1  0      
 12 22  1  0      
 17 23  1  0      
 23 24  2  0      
  4 25  1  0      
  2 26  1  0      
 27 28  1  0      
 31 32  1  0      
 32 27  1  0      
 26 31  1  0      
 31 30  1  0      
 30 29  1  0      
 28 29  1  0      
 29 33  1  0      
 28 34  1  0      
 27 35  1  0      
 30 36  1  0      
 36 38  1  0      
 37 38  2  0      
 38 39  1  0      
 40 42  1  0      
 41 42  2  0      
 42 43  1  0      
 18 40  1  0      
M  STY  1   1 SUP
M  SLB  1   1   1
M  SAL   1  4  36  37  38  39
M  SBL   1  1  40
M  SMT   1 OAc
M  SBV   1 40   -7.4950    6.1051
M  STY  1   2 SUP
M  SLB  1   2   2
M  SAL   2  4  40  41  42  43
M  SBL   2  1  47
M  SMT   2 OAc
M  SBV   2 47   -8.2105    6.5176
M  END
$$$$
