# Supplementary material for: Cytotoxic and Anti-Inflammatory Metabolites from the Soft Coral Scleronephthya gracillimum
Source: MDPI journal article supplement (doi:10.3390/md11061853), 2013-05-29
Supplement: s9 [file s9]

marinedrugs-11-01853-s004.mol
  ChemDraw04151409572D

 43 47  0  0  0  0  0  0  0  0999 V2000
   -1.1366    0.4161    0.0000 C   0  0  0  0  0  0  0  0  0  0  0  0
   -1.1366   -0.4089    0.0000 C   0  0  0  0  0  0  0  0  0  0  0  0
   -0.4221   -0.8214    0.0000 C   0  0  0  0  0  0  0  0  0  0  0  0
    0.2923   -0.4089    0.0000 C   0  0  0  0  0  0  0  0  0  0  0  0
    0.2923    0.4161    0.0000 C   0  0  0  0  0  0  0  0  0  0  0  0
   -0.4221    0.8286    0.0000 C   0  0  0  0  0  0  0  0  0  0  0  0
    1.0068   -0.8214    0.0000 C   0  0  0  0  0  0  0  0  0  0  0  0
    1.7213   -0.4089    0.0000 C   0  0  0  0  0  0  0  0  0  0  0  0
    1.7213    0.4161    0.0000 C   0  0  0  0  0  0  0  0  0  0  0  0
    1.0068    0.8286    0.0000 C   0  0  0  0  0  0  0  0  0  0  0  0
    2.4358    0.8286    0.0000 C   0  0  0  0  0  0  0  0  0  0  0  0
    2.4358    1.6536    0.0000 C   0  0  0  0  0  0  0  0  0  0  0  0
    1.7213    2.0661    0.0000 C   0  0  0  0  0  0  0  0  0  0  0  0
    1.0068    1.6536    0.0000 C   0  0  0  0  0  0  0  0  0  0  0  0
    3.2204    0.5737    0.0000 C   0  0  0  0  0  0  0  0  0  0  0  0
    3.7053    1.2411    0.0000 C   0  0  0  0  0  0  0  0  0  0  0  0
    3.2204    1.9085    0.0000 C   0  0  0  0  0  0  0  0  0  0  0  0
    0.2923    1.2411    0.0000 C   0  0  0  0  0  0  0  0  0  0  0  0
    1.0068    0.0036    0.0000 H   0  0  0  0  0  0  0  0  0  0  0  0
    2.4358    0.0036    0.0000 H   0  0  0  0  0  0  0  0  0  0  0  0
    1.7213    1.2411    0.0000 H   0  0  0  0  0  0  0  0  0  0  0  0
    2.4358    2.4786    0.0000 C   0  0  0  0  0  0  0  0  0  0  0  0
    3.4339    2.7054    0.0000 C   0  0  0  0  0  0  0  0  0  0  0  0
    4.2308    2.9190    0.0000 C   0  0  0  0  0  0  0  0  0  0  0  0
    0.2923   -1.2339    0.0000 H   0  0  0  0  0  0  0  0  0  0  0  0
   -1.8511   -0.8214    0.0000 O   0  0  0  0  0  0  0  0  0  0  0  0
   -3.4339   -1.3795    0.0000 C   0  0  0  0  0  0  0  0  0  0  0  0
   -3.8464   -2.0940    0.0000 C   0  0  0  0  0  0  0  0  0  0  0  0
   -3.0532   -1.8672    0.0000 C   0  0  0  0  0  0  0  0  0  0  0  0
   -2.2551   -2.0940    0.0000 C   0  0  0  0  0  0  0  0  0  0  0  0
   -1.8425   -1.3795    0.0000 C   0  0  0  0  0  0  0  0  0  0  0  0
   -2.6358   -1.6061    0.0000 O   0  0  0  0  0  0  0  0  0  0  0  0
   -3.2667   -2.6641    0.0000 O   0  0  0  0  0  0  0  0  0  0  0  0
   -3.8464   -2.9190    0.0000 O   0  0  0  0  0  0  0  0  0  0  0  0
   -4.2308   -1.5930    0.0000 C   0  0  0  0  0  0  0  0  0  0  0  0
   -2.2554   -2.5065    0.0000 O   0  0  0  0  0  0  0  0  0  0  0  0
   -2.9699   -1.2690    0.0000 O   0  0  0  0  0  0  0  0  0  0  0  0
   -2.9699   -2.0940    0.0000 C   0  0  0  0  0  0  0  0  0  0  0  0
   -3.6843   -2.5065    0.0000 C   0  0  0  0  0  0  0  0  0  0  0  0
   -0.4235    1.2411    0.0000 O   0  0  0  0  0  0  0  0  0  0  0  0
   -0.9098    2.0833    0.0000 O   0  0  0  0  0  0  0  0  0  0  0  0
   -0.9098    1.5218    0.0000 C   0  0  0  0  0  0  0  0  0  0  0  0
   -1.3960    1.2411    0.0000 C   0  0  0  0  0  0  0  0  0  0  0  0
  1  2  1  0      
  2  3  1  0      
  3  4  1  0      
  4  5  1  0      
  5  6  1  0      
  6  1  1  0      
  4  7  1  0      
  7  8  1  0      
  8  9  1  0      
  9 10  1  0      
 10  5  1  0      
  9 11  1  0      
 11 12  1  0      
 12 13  1  0      
 13 14  1  0      
 14 10  1  0      
 11 15  1  0      
 15 16  1  0      
 16 17  1  0      
 17 12  1  0      
  5 18  1  1      
 10 19  1  6      
 11 20  1  6      
  9 21  1  1      
 12 22  1  1      
 17 23  1  1      
 23 24  2  0      
  4 25  1  6      
  2 26  1  1      
 27 28  1  0      
 31 32  1  0      
 32 27  1  0      
 26 31  1  0      
 31 30  1  1      
 30 29  1  1      
 28 29  1  1      
 29 33  1  0      
 28 34  1  0      
 27 35  1  0      
 30 36  1  0      
 36 38  1  0      
 37 38  2  0      
 38 39  1  0      
 40 42  1  0      
 41 42  2  0      
 42 43  1  0      
 18 40  1  0      
M  STY  1   1 SUP
M  SLB  1   1   1
M  SAL   1  4  36  37  38  39
M  SBL   1  1  40
M  SMT   1 OAc
M  SBV   1 40   -7.4950    6.1051
M  STY  1   2 SUP
M  SLB  1   2   2
M  SAL   2  4  40  41  42  43
M  SBL   2  1  47
M  SMT   2 OAc
M  SBV   2 47   -8.2105    6.5176
M  END
