# Supplementary material for: Cytotoxic and Anti-Inflammatory Metabolites from the Soft Coral Scleronephthya gracillimum
Source: MDPI journal article supplement (doi:10.3390/md11061853), 2013-05-29
Supplement: s10 [file s10]

marinedrugs-11-01853-s005.mol
  corina  04141422093D 1   1.00000     0.00000 
CORINA 3.49 0023  12.04.2013
 41 45  0  0  0  0  0  0  0  0999 V2000
   -0.0187    1.5258    0.0104 C   0  0  0  0  0  0  0  0  0  0  0  0
    0.0021   -0.0041    0.0020 C   0  0  0  0  0  0  0  0  0  0  0  0
    0.7416   -0.5101    1.2423 C   0  0  0  0  0  0  0  0  0  0  0  0
    2.1769    0.0191    1.2310 C   0  0  0  0  0  0  0  0  0  0  0  0
    2.1577    1.5491    1.2388 C   0  0  0  0  0  0  0  0  0  0  0  0
    1.4165    2.0555   -0.0004 C   0  0  0  0  0  0  0  0  0  0  0  0
    2.9185   -0.4897    2.4684 C   0  0  0  0  0  0  0  0  0  0  0  0
    4.3539    0.0404    2.4580 C   0  0  0  0  0  0  0  0  0  0  0  0
    4.3317    1.5694    2.4727 C   0  0  0  0  0  0  0  0  0  0  0  0
    3.5935    2.0752    1.2236 C   0  0  0  0  0  0  0  0  0  0  0  0
    5.7447    2.1185    2.4124 C   0  0  0  0  0  0  0  0  0  0  0  0
    5.6360    3.6638    2.5191 C   0  0  0  0  0  0  0  0  0  0  0  0
    5.0184    4.1656    1.2287 C   0  0  0  0  0  0  0  0  0  0  0  0
    3.5907    3.5985    1.1534 C   0  0  0  0  0  0  0  0  0  0  0  0
    6.6428    1.7877    3.6093 C   0  0  0  0  0  0  0  0  0  0  0  0
    7.7155    2.9098    3.5594 C   0  0  0  0  0  0  0  0  0  0  0  0
    7.0707    4.0972    2.8018 C   0  0  0  0  0  0  0  0  0  0  0  0
    1.4548    2.0369    2.4794 C   0  0  0  0  0  0  0  0  0  0  0  0
    4.0991    1.6933    0.3366 H   0  0  0  0  0  0  0  0  0  0  0  0
    6.2224    1.8337    1.4750 H   0  0  0  0  0  0  0  0  0  0  0  0
    3.8221    1.9216    3.3695 H   0  0  0  0  0  0  0  0  0  0  0  0
    4.7402    4.0390    3.7013 C   0  0  0  0  0  0  0  0  0  0  0  0
    7.0824    5.3341    3.6628 C   0  0  0  0  0  0  0  0  0  0  0  0
    7.6890    6.4173    3.2448 C   0  0  0  0  0  0  0  0  0  0  0  0
    2.6864   -0.3329    0.3339 H   0  0  0  0  0  0  0  0  0  0  0  0
   -1.3385   -0.4988    0.0117 O   0  0  0  0  0  0  0  0  0  0  0  0
    0.4261    1.7623    2.6605 H   0  0  0  0  0  0  0  0  0  0  0  0
   -2.5445    0.4860   -3.2749 C   0  0  0  0  0  0  0  0  0  0  0  0
   -3.9536   -0.1106   -3.2270 C   0  0  0  0  0  0  0  0  0  0  0  0
   -3.8945   -1.4867   -2.5567 C   0  0  0  0  0  0  0  0  0  0  0  0
   -3.2788   -1.3370   -1.1621 C   0  0  0  0  0  0  0  0  0  0  0  0
   -1.8958   -0.6930   -1.2898 C   0  0  0  0  0  0  0  0  0  0  0  0
   -2.0185    0.5690   -1.9488 O   0  0  0  0  0  0  0  0  0  0  0  0
   -5.2154   -2.0194   -2.4414 O   0  0  0  0  0  0  0  0  0  0  0  0
   -4.4594   -0.2484   -4.5564 O   0  0  0  0  0  0  0  0  0  0  0  0
   -1.6410   -0.4072   -4.1273 C   0  0  0  0  0  0  0  0  0  0  0  0
    2.0419    2.7347    3.2711 O   0  0  0  0  0  0  0  0  0  0  0  0
   -3.1498   -2.6454   -0.5457 O   0  0  0  0  0  0  0  0  0  0  0  0
   -3.3965   -1.6852    1.4293 O   0  0  0  0  0  0  0  0  0  0  0  0
   -3.2268   -2.6984    0.7933 C   0  0  0  0  0  0  0  0  0  0  0  0
   -3.1018   -4.0217    1.5035 C   0  0  0  0  0  0  0  0  0  0  0  0
  1  2  1  0      
  2  3  1  0      
  3  4  1  0      
  4  5  1  0      
  5  6  1  0      
  6  1  1  0      
  4  7  1  0      
  7  8  1  0      
  8  9  1  0      
  9 10  1  0      
 10  5  1  0      
  9 11  1  0      
 11 12  1  0      
 12 13  1  0      
 13 14  1  0      
 14 10  1  0      
 11 15  1  0      
 15 16  1  0      
 16 17  1  0      
 17 12  1  0      
  5 18  1  0      
 10 19  1  0      
 11 20  1  0      
  9 21  1  0      
 12 22  1  0      
 17 23  1  0      
 23 24  2  0      
  4 25  1  0      
  2 26  1  0      
 18 27  1  0      
 28 29  1  0      
 32 33  1  0      
 33 28  1  0      
 26 32  1  0      
 32 31  1  0      
 31 30  1  0      
 29 30  1  0      
 30 34  1  0      
 29 35  1  0      
 28 36  1  0      
 18 37  2  0      
 31 38  1  0      
 38 40  1  0      
 39 40  2  0      
 40 41  1  0      
M  STY  1   1 SUP
M  SLB  1   1   1
M  SAL   1  4  38  39  40  41
M  SBL   1  1  42
M  SMT   1 OAc
M  SBV   1 42   -8.0502    5.9550
M  END
$$$$
