# Supplementary material for: Cytotoxic and Anti-Inflammatory Metabolites from the Soft Coral Scleronephthya gracillimum
Source: MDPI journal article supplement (doi:10.3390/md11061853), 2013-05-29
Supplement: s11 [file s11]

marinedrugs-11-01853-s005.mol
  ChemDraw04151409582D

 41 45  0  0  0  0  0  0  0  0999 V2000
   -1.1278    0.4161    0.0000 C   0  0  0  0  0  0  0  0  0  0  0  0
   -1.1278   -0.4089    0.0000 C   0  0  0  0  0  0  0  0  0  0  0  0
   -0.4133   -0.8214    0.0000 C   0  0  0  0  0  0  0  0  0  0  0  0
    0.3011   -0.4089    0.0000 C   0  0  0  0  0  0  0  0  0  0  0  0
    0.3011    0.4161    0.0000 C   0  0  0  0  0  0  0  0  0  0  0  0
   -0.4133    0.8286    0.0000 C   0  0  0  0  0  0  0  0  0  0  0  0
    1.0156   -0.8214    0.0000 C   0  0  0  0  0  0  0  0  0  0  0  0
    1.7301   -0.4089    0.0000 C   0  0  0  0  0  0  0  0  0  0  0  0
    1.7301    0.4161    0.0000 C   0  0  0  0  0  0  0  0  0  0  0  0
    1.0156    0.8286    0.0000 C   0  0  0  0  0  0  0  0  0  0  0  0
    2.4446    0.8286    0.0000 C   0  0  0  0  0  0  0  0  0  0  0  0
    2.4446    1.6536    0.0000 C   0  0  0  0  0  0  0  0  0  0  0  0
    1.7301    2.0661    0.0000 C   0  0  0  0  0  0  0  0  0  0  0  0
    1.0156    1.6536    0.0000 C   0  0  0  0  0  0  0  0  0  0  0  0
    3.2292    0.5737    0.0000 C   0  0  0  0  0  0  0  0  0  0  0  0
    3.7141    1.2411    0.0000 C   0  0  0  0  0  0  0  0  0  0  0  0
    3.2292    1.9085    0.0000 C   0  0  0  0  0  0  0  0  0  0  0  0
    0.3011    1.2411    0.0000 C   0  0  0  0  0  0  0  0  0  0  0  0
    1.0156    0.0036    0.0000 H   0  0  0  0  0  0  0  0  0  0  0  0
    2.4446    0.0036    0.0000 H   0  0  0  0  0  0  0  0  0  0  0  0
    1.7301    1.2411    0.0000 H   0  0  0  0  0  0  0  0  0  0  0  0
    2.4446    2.4786    0.0000 C   0  0  0  0  0  0  0  0  0  0  0  0
    3.4427    2.7054    0.0000 C   0  0  0  0  0  0  0  0  0  0  0  0
    4.2396    2.9190    0.0000 C   0  0  0  0  0  0  0  0  0  0  0  0
    0.3011   -1.2339    0.0000 H   0  0  0  0  0  0  0  0  0  0  0  0
   -1.8423   -0.8214    0.0000 O   0  0  0  0  0  0  0  0  0  0  0  0
   -0.4133    1.6536    0.0000 H   0  0  0  0  0  0  0  0  0  0  0  0
   -3.4251   -1.3795    0.0000 C   0  0  0  0  0  0  0  0  0  0  0  0
   -3.8376   -2.0940    0.0000 C   0  0  0  0  0  0  0  0  0  0  0  0
   -3.0444   -1.8672    0.0000 C   0  0  0  0  0  0  0  0  0  0  0  0
   -2.2463   -2.0940    0.0000 C   0  0  0  0  0  0  0  0  0  0  0  0
   -1.8337   -1.3795    0.0000 C   0  0  0  0  0  0  0  0  0  0  0  0
   -2.6270   -1.6061    0.0000 O   0  0  0  0  0  0  0  0  0  0  0  0
   -3.2579   -2.6641    0.0000 O   0  0  0  0  0  0  0  0  0  0  0  0
   -3.8376   -2.9190    0.0000 O   0  0  0  0  0  0  0  0  0  0  0  0
   -4.2220   -1.5930    0.0000 C   0  0  0  0  0  0  0  0  0  0  0  0
    0.8845    1.8245    0.0000 O   0  0  0  0  0  0  0  0  0  0  0  0
   -2.8106   -2.6566    0.0000 O   0  0  0  0  0  0  0  0  0  0  0  0
   -3.5251   -1.4191    0.0000 O   0  0  0  0  0  0  0  0  0  0  0  0
   -3.5251   -2.2441    0.0000 C   0  0  0  0  0  0  0  0  0  0  0  0
   -4.2396   -2.6566    0.0000 C   0  0  0  0  0  0  0  0  0  0  0  0
  1  2  1  0      
  2  3  1  0      
  3  4  1  0      
  4  5  1  0      
  5  6  1  0      
  6  1  1  0      
  4  7  1  0      
  7  8  1  0      
  8  9  1  0      
  9 10  1  0      
 10  5  1  0      
  9 11  1  0      
 11 12  1  0      
 12 13  1  0      
 13 14  1  0      
 14 10  1  0      
 11 15  1  0      
 15 16  1  0      
 16 17  1  0      
 17 12  1  0      
  5 18  1  1      
 10 19  1  6      
 11 20  1  6      
  9 21  1  1      
 12 22  1  1      
 17 23  1  1      
 23 24  2  0      
  4 25  1  6      
  2 26  1  1      
 18 27  1  0      
 28 29  1  0      
 32 33  1  0      
 33 28  1  0      
 26 32  1  0      
 32 31  1  1      
 31 30  1  1      
 29 30  1  1      
 30 34  1  0      
 29 35  1  0      
 28 36  1  0      
 18 37  2  0      
 31 38  1  0      
 38 40  1  0      
 39 40  2  0      
 40 41  1  0      
M  STY  1   1 SUP
M  SLB  1   1   1
M  SAL   1  4  38  39  40  41
M  SBL   1  1  42
M  SMT   1 OAc
M  SBV   1 42   -8.0502    5.9550
M  END
