# Supplementary material for: Cytotoxic and Anti-Inflammatory Metabolites from the Soft Coral Scleronephthya gracillimum
Source: MDPI journal article supplement (doi:10.3390/md11061853), 2013-05-29
Supplement: s12 [file s12]

marinedrugs-11-01853-s006.mol
  corina  04141422093D 1   1.00000     0.00000 
CORINA 3.49 0023  12.04.2013
 26 26  0  0  0  0  0  0  0  0999 V2000
   -0.0187    1.5257    0.0104 C   0  0  0  0  0  0  0  0  0  0  0  0
    0.0021   -0.0041    0.0020 C   0  0  0  0  0  0  0  0  0  0  0  0
    0.9322   -0.4664    1.0261 O   0  0  0  0  0  0  0  0  0  0  0  0
    2.2118   -0.0514    0.8429 C   0  0  0  0  0  0  0  0  0  0  0  0
    2.4197    1.3361    0.3909 C   0  0  0  0  0  0  0  0  0  0  0  0
    1.3836    2.0681   -0.0000 C   0  0  0  0  0  0  0  0  0  0  0  0
   -1.3997   -0.5377    0.3037 C   0  0  0  0  0  0  0  0  0  0  0  0
   -1.4044   -2.0621    0.1722 C   0  0  0  0  0  0  0  0  0  0  0  0
   -2.7707   -2.6062    0.5941 C   0  0  0  0  0  0  0  0  0  0  0  0
   -2.7363   -4.1358    0.5821 C   0  0  0  0  0  0  0  0  0  0  0  0
   -4.1026   -4.6799    1.0041 C   0  0  0  0  0  0  0  0  0  0  0  0
   -4.0682   -6.2095    0.9921 C   0  0  0  0  0  0  0  0  0  0  0  0
   -5.3921   -6.7536    1.5325 C   0  0  0  0  0  0  0  0  0  0  0  0
   -5.3121   -8.2779    1.6377 C   0  0  0  0  0  0  0  0  0  0  0  0
   -6.6360   -8.8220    2.1781 C   0  0  0  0  0  0  0  0  0  0  0  0
   -6.5560  -10.3463    2.2832 C   0  0  0  0  0  0  0  0  0  0  0  0
   -7.9185  -10.9007    2.7043 C   0  0  0  0  0  0  0  0  0  0  0  0
   -1.1281   -2.4493   -1.2820 C   0  0  0  0  0  0  0  0  0  0  0  0
    1.6194    3.4812   -0.4676 C   0  0  0  0  0  0  0  0  0  0  0  0
    3.1508   -0.7961    1.0445 O   0  0  0  0  0  0  0  0  0  0  0  0
   -3.8607   -6.7037   -0.4410 C   0  0  0  0  0  0  0  0  0  0  0  0
   -6.1651  -10.9314    0.9247 C   0  0  0  0  0  0  0  0  0  0  0  0
   -5.5581  -10.7115    3.2727 O   0  0  0  0  0  0  0  0  0  0  0  0
   -6.0058  -12.8374    2.8683 O   0  0  0  0  0  0  0  0  0  0  0  0
   -5.3635  -12.0222    3.4870 C   0  0  0  0  0  0  0  0  0  0  0  0
   -4.3440  -12.4770    4.4993 C   0  0  0  0  0  0  0  0  0  0  0  0
  1  2  1  0      
  2  3  1  0      
  3  4  1  0      
  4  5  1  0      
  5  6  2  0      
  6  1  1  0      
  2  7  1  0      
  7  8  1  0      
  8  9  1  0      
  9 10  1  0      
 10 11  1  0      
 11 12  1  0      
 12 13  1  0      
 13 14  1  0      
 14 15  1  0      
 15 16  1  0      
 16 17  1  0      
  8 18  1  0      
  6 19  1  0      
  4 20  2  0      
 12 21  1  0      
 16 22  1  0      
 16 23  1  0      
 23 25  1  0      
 24 25  2  0      
 25 26  1  0      
M  STY  1   1 SUP
M  SLB  1   1   1
M  SAL   1  4  23  24  25  26
M  SBL   1  1  23
M  SMT   1 OAc
M  SBV   1 23   -7.3251    6.8255
M  END
$$$$
