# Supplementary material for: Cytotoxic and Anti-Inflammatory Metabolites from the Soft Coral Scleronephthya gracillimum
Source: MDPI journal article supplement (doi:10.3390/md11061853), 2013-05-29
Supplement: s13 [file s13]

marinedrugs-11-01853-s006.mol
  ChemDraw04151410032D

 26 26  0  0  0  0  0  0  0  0999 V2000
    3.3941    0.1509    0.0000 C   0  0  0  0  0  0  0  0  0  0  0  0
    3.3941   -0.6740    0.0000 C   0  0  0  0  0  0  0  0  0  0  0  0
    4.1086   -1.0865    0.0000 O   0  0  0  0  0  0  0  0  0  0  0  0
    4.8231   -0.6740    0.0000 C   0  0  0  0  0  0  0  0  0  0  0  0
    4.8231    0.1509    0.0000 C   0  0  0  0  0  0  0  0  0  0  0  0
    4.1086    0.5634    0.0000 C   0  0  0  0  0  0  0  0  0  0  0  0
    2.6795   -1.0865    0.0000 C   0  0  0  0  0  0  0  0  0  0  0  0
    1.9652   -0.6740    0.0000 C   0  0  0  0  0  0  0  0  0  0  0  0
    1.2507   -1.0865    0.0000 C   0  0  0  0  0  0  0  0  0  0  0  0
    0.5361   -0.6740    0.0000 C   0  0  0  0  0  0  0  0  0  0  0  0
   -0.1784   -1.0865    0.0000 C   0  0  0  0  0  0  0  0  0  0  0  0
   -0.8929   -0.6740    0.0000 C   0  0  0  0  0  0  0  0  0  0  0  0
   -1.6073   -1.0865    0.0000 C   0  0  0  0  0  0  0  0  0  0  0  0
   -2.3218   -0.6740    0.0000 C   0  0  0  0  0  0  0  0  0  0  0  0
   -3.0362   -1.0865    0.0000 C   0  0  0  0  0  0  0  0  0  0  0  0
   -3.7508   -0.6740    0.0000 C   0  0  0  0  0  0  0  0  0  0  0  0
   -4.1633   -1.3885    0.0000 C   0  0  0  0  0  0  0  0  0  0  0  0
    1.9652    0.1509    0.0000 C   0  0  0  0  0  0  0  0  0  0  0  0
    4.1086    1.3885    0.0000 C   0  0  0  0  0  0  0  0  0  0  0  0
    5.5374   -1.0865    0.0000 O   0  0  0  0  0  0  0  0  0  0  0  0
   -0.8929    0.1509    0.0000 C   0  0  0  0  0  0  0  0  0  0  0  0
   -4.5477   -0.8876    0.0000 C   0  0  0  0  0  0  0  0  0  0  0  0
   -4.1085   -0.4670    0.0000 O   0  0  0  0  0  0  0  0  0  0  0  0
   -4.8230    0.7705    0.0000 O   0  0  0  0  0  0  0  0  0  0  0  0
   -4.8230   -0.0545    0.0000 C   0  0  0  0  0  0  0  0  0  0  0  0
   -5.5374   -0.4670    0.0000 C   0  0  0  0  0  0  0  0  0  0  0  0
  1  2  1  0      
  2  3  1  0      
  3  4  1  0      
  4  5  1  0      
  5  6  2  0      
  6  1  1  0      
  2  7  1  0      
  7  8  1  0      
  8  9  1  0      
  9 10  1  0      
 10 11  1  0      
 11 12  1  0      
 12 13  1  0      
 13 14  1  0      
 14 15  1  0      
 15 16  1  0      
 16 17  1  0      
  8 18  1  0      
  6 19  1  0      
  4 20  2  0      
 12 21  1  0      
 16 22  1  0      
 16 23  1  0      
 23 25  1  0      
 24 25  2  0      
 25 26  1  0      
M  STY  1   1 SUP
M  SLB  1   1   1
M  SAL   1  4  23  24  25  26
M  SBL   1  1  23
M  SMT   1 OAc
M  SBV   1 23   -7.3251    6.8255
M  END
