# Supplementary material for: Cytotoxic and Anti-Inflammatory Metabolites from the Soft Coral Scleronephthya gracillimum
Source: MDPI journal article supplement (doi:10.3390/md11061853), 2013-05-29
Supplement: s15 [file s15]

marinedrugs-11-01853-s012.mol
  ChemDraw01301415072D

 30 33  0  0  0  0  0  0  0  0999 V2000
   -2.4253   -0.3852    0.0000 C   0  0  0  0  0  0  0  0  0  0  0  0
   -2.4253   -1.2102    0.0000 C   0  0  0  0  0  0  0  0  0  0  0  0
   -1.7108   -1.6227    0.0000 C   0  0  0  0  0  0  0  0  0  0  0  0
   -0.9963   -1.2102    0.0000 C   0  0  0  0  0  0  0  0  0  0  0  0
   -0.9963   -0.3852    0.0000 C   0  0  0  0  0  0  0  0  0  0  0  0
   -1.7108    0.0273    0.0000 C   0  0  0  0  0  0  0  0  0  0  0  0
   -0.2818   -1.6227    0.0000 C   0  0  0  0  0  0  0  0  0  0  0  0
    0.4326   -1.2102    0.0000 C   0  0  0  0  0  0  0  0  0  0  0  0
    0.4326   -0.3852    0.0000 C   0  0  0  0  0  0  0  0  0  0  0  0
   -0.2818    0.0273    0.0000 C   0  0  0  0  0  0  0  0  0  0  0  0
    1.1471    0.0273    0.0000 C   0  0  0  0  0  0  0  0  0  0  0  0
    1.1471    0.8523    0.0000 C   0  0  0  0  0  0  0  0  0  0  0  0
    0.4326    1.2648    0.0000 C   0  0  0  0  0  0  0  0  0  0  0  0
   -0.2818    0.8523    0.0000 C   0  0  0  0  0  0  0  0  0  0  0  0
    1.9317   -0.2277    0.0000 C   0  0  0  0  0  0  0  0  0  0  0  0
    2.4166    0.4398    0.0000 C   0  0  0  0  0  0  0  0  0  0  0  0
    1.9317    1.1072    0.0000 C   0  0  0  0  0  0  0  0  0  0  0  0
    2.3442    1.8217    0.0000 C   0  0  0  0  0  0  0  0  0  0  0  0
    3.1411    2.0352    0.0000 C   0  0  0  0  0  0  0  0  0  0  0  0
    1.1471    1.6773    0.0000 C   0  0  0  0  0  0  0  0  0  0  0  0
    0.4326    0.4398    0.0000 H   0  0  0  0  0  0  0  0  0  0  0  0
   -0.9963    0.4398    0.0000 C   0  0  0  0  0  0  0  0  0  0  0  0
   -3.1397   -1.6227    0.0000 O   0  0  0  0  0  0  0  0  0  0  0  0
   -0.9963   -2.0352    0.0000 H   0  0  0  0  0  0  0  0  0  0  0  0
   -0.2818   -0.7977    0.0000 H   0  0  0  0  0  0  0  0  0  0  0  0
    1.1471   -0.7977    0.0000 H   0  0  0  0  0  0  0  0  0  0  0  0
   -1.7122    0.4412    0.0000 O   0  0  0  0  0  0  0  0  0  0  0  0
   -2.4266    1.6787    0.0000 O   0  0  0  0  0  0  0  0  0  0  0  0
   -2.4266    0.8537    0.0000 C   0  0  0  0  0  0  0  0  0  0  0  0
   -3.1411    0.4412    0.0000 C   0  0  0  0  0  0  0  0  0  0  0  0
  1  2  1  0      
  2  3  1  0      
  3  4  1  0      
  4  5  1  0      
  5  6  1  0      
  6  1  1  0      
  4  7  1  0      
  7  8  1  0      
  8  9  1  0      
  9 10  1  0      
 10  5  1  0      
  9 11  1  0      
 11 12  1  0      
 12 13  1  0      
 13 14  1  0      
 14 10  1  0      
 11 15  1  0      
 15 16  1  0      
 16 17  1  0      
 17 12  1  0      
 17 18  1  1      
 18 19  2  0      
 12 20  1  1      
  9 21  1  1      
  5 22  1  1      
  2 23  1  1      
  4 24  1  6      
 10 25  1  6      
 11 26  1  6      
 22 27  1  0      
 27 29  1  0      
 28 29  2  0      
 29 30  1  0      
M  STY  1   1 SUP
M  SLB  1   1   1
M  SAL   1  4  27  28  29  30
M  SBL   1  1  30
M  SMT   1 OAc
M  SBV   1 30   -6.5929    3.1224
M  END
