# Supplementary material for: Cytotoxic and Anti-Inflammatory Metabolites from the Soft Coral Scleronephthya gracillimum
Source: MDPI journal article supplement (doi:10.3390/md11061853), 2013-05-29
Supplement: s16 [file s16]

marinedrugs-11-01853-s013.mol
  corina  04141422093D 1   1.00000     0.00000 
CORINA 3.49 0023  12.04.2013
 32 35  0  0  0  0  0  0  0  0999 V2000
    0.0292    1.7248   -0.0660 C   0  0  0  0  0  0  0  0  0  0  0  0
   -0.0533    0.1991   -0.1382 C   0  0  0  0  0  0  0  0  0  0  0  0
    0.5208   -0.4045    1.1471 C   0  0  0  0  0  0  0  0  0  0  0  0
    1.9310    0.1282    1.3382 C   0  0  0  0  0  0  0  0  0  0  0  0
    2.1337    1.6129    1.2752 C   0  0  0  0  0  0  0  0  0  0  0  0
    1.4948    2.1598   -0.0045 C   0  0  0  0  0  0  0  0  0  0  0  0
    2.8887   -0.7263    1.5497 C   0  0  0  0  0  0  0  0  0  0  0  0
    4.3198   -0.3184    1.7454 C   0  0  0  0  0  0  0  0  0  0  0  0
    4.3657    1.1078    2.3049 C   0  0  0  0  0  0  0  0  0  0  0  0
    3.5948    2.0244    1.3449 C   0  0  0  0  0  0  0  0  0  0  0  0
    5.8044    1.5908    2.3443 C   0  0  0  0  0  0  0  0  0  0  0  0
    5.7939    3.0204    2.9488 C   0  0  0  0  0  0  0  0  0  0  0  0
    5.1606    3.9351    1.9176 C   0  0  0  0  0  0  0  0  0  0  0  0
    3.6986    3.4907    1.7552 C   0  0  0  0  0  0  0  0  0  0  0  0
    6.7303    0.8495    3.3149 C   0  0  0  0  0  0  0  0  0  0  0  0
    7.8658    1.8789    3.5664 C   0  0  0  0  0  0  0  0  0  0  0  0
    7.2629    3.2750    3.2713 C   0  0  0  0  0  0  0  0  0  0  0  0
    7.3852    4.1631    4.4827 C   0  0  0  0  0  0  0  0  0  0  0  0
    8.0382    5.2958    4.4012 C   0  0  0  0  0  0  0  0  0  0  0  0
    4.9644    3.0347    4.2344 C   0  0  0  0  0  0  0  0  0  0  0  0
    3.9163    1.1378    3.2975 H   0  0  0  0  0  0  0  0  0  0  0  0
    1.4174    2.2433    2.4712 C   0  0  0  0  0  0  0  0  0  0  0  0
    4.0283    1.9230    0.3500 H   0  0  0  0  0  0  0  0  0  0  0  0
    6.2259    1.6061    1.3392 H   0  0  0  0  0  0  0  0  0  0  0  0
    1.9757    1.7151    3.7032 O   0  0  0  0  0  0  0  0  0  0  0  0
    0.5594    2.9824    4.8309 O   0  0  0  0  0  0  0  0  0  0  0  0
    1.4535    2.1699    4.8530 C   0  0  0  0  0  0  0  0  0  0  0  0
    1.9822    1.6671    6.1716 C   0  0  0  0  0  0  0  0  0  0  0  0
   -1.4404   -0.2042   -0.2849 O   0  0  0  0  0  0  0  0  0  0  0  0
   -0.7544   -1.9805   -1.4064 O   0  0  0  0  0  0  0  0  0  0  0  0
   -1.6764   -1.3424   -0.9562 C   0  0  0  0  0  0  0  0  0  0  0  0
   -3.0913   -1.8243   -1.1484 C   0  0  0  0  0  0  0  0  0  0  0  0
  1  2  1  0      
  2  3  1  0      
  3  4  1  0      
  4  5  1  0      
  5  6  1  0      
  6  1  1  0      
  4  7  2  0      
  7  8  1  0      
  8  9  1  0      
  9 10  1  0      
 10  5  1  0      
  9 11  1  0      
 11 12  1  0      
 12 13  1  0      
 13 14  1  0      
 14 10  1  0      
 11 15  1  0      
 15 16  1  0      
 16 17  1  0      
 17 12  1  0      
 17 18  1  0      
 18 19  2  0      
 12 20  1  0      
  9 21  1  0      
  5 22  1  0      
 10 23  1  0      
 11 24  1  0      
 22 25  1  0      
 25 27  1  0      
 26 27  2  0      
 27 28  1  0      
  2 29  1  0      
 29 31  1  0      
 30 31  2  0      
 31 32  1  0      
M  STY  1   1 SUP
M  SLB  1   1   1
M  SAL   1  4  25  26  27  28
M  SBL   1  1  28
M  SMT   1 OAc
M  SBV   1 28   -6.5179    5.1230
M  STY  1   2 SUP
M  SLB  1   2   2
M  SAL   2  4  29  30  31  32
M  SBL   2  1  32
M  SMT   2 OAc
M  SBV   2 32   -6.5176    4.7092
M  END
$$$$
