# Supplementary material for: Cytotoxic and Anti-Inflammatory Metabolites from the Soft Coral Scleronephthya gracillimum
Source: MDPI journal article supplement (doi:10.3390/md11061853), 2013-05-29
Supplement: s17 [file s17]

marinedrugs-11-01853-s013.mol
  ChemDraw01301415072D

 32 35  0  0  0  0  0  0  0  0999 V2000
   -1.7109   -0.5915    0.0000 C   0  0  0  0  0  0  0  0  0  0  0  0
   -1.7109   -1.4165    0.0000 C   0  0  0  0  0  0  0  0  0  0  0  0
   -0.9965   -1.8290    0.0000 C   0  0  0  0  0  0  0  0  0  0  0  0
   -0.2820   -1.4165    0.0000 C   0  0  0  0  0  0  0  0  0  0  0  0
   -0.2820   -0.5915    0.0000 C   0  0  0  0  0  0  0  0  0  0  0  0
   -0.9965   -0.1790    0.0000 C   0  0  0  0  0  0  0  0  0  0  0  0
    0.4325   -1.8290    0.0000 C   0  0  0  0  0  0  0  0  0  0  0  0
    1.1469   -1.4165    0.0000 C   0  0  0  0  0  0  0  0  0  0  0  0
    1.1469   -0.5915    0.0000 C   0  0  0  0  0  0  0  0  0  0  0  0
    0.4325   -0.1790    0.0000 C   0  0  0  0  0  0  0  0  0  0  0  0
    1.8614   -0.1790    0.0000 C   0  0  0  0  0  0  0  0  0  0  0  0
    1.8614    0.6460    0.0000 C   0  0  0  0  0  0  0  0  0  0  0  0
    1.1469    1.0585    0.0000 C   0  0  0  0  0  0  0  0  0  0  0  0
    0.4325    0.6460    0.0000 C   0  0  0  0  0  0  0  0  0  0  0  0
    2.6460   -0.4339    0.0000 C   0  0  0  0  0  0  0  0  0  0  0  0
    3.1310    0.2335    0.0000 C   0  0  0  0  0  0  0  0  0  0  0  0
    2.6460    0.9010    0.0000 C   0  0  0  0  0  0  0  0  0  0  0  0
    3.0585    1.6154    0.0000 C   0  0  0  0  0  0  0  0  0  0  0  0
    3.8554    1.8290    0.0000 C   0  0  0  0  0  0  0  0  0  0  0  0
    1.8614    1.4710    0.0000 C   0  0  0  0  0  0  0  0  0  0  0  0
    1.1469    0.2335    0.0000 H   0  0  0  0  0  0  0  0  0  0  0  0
   -0.2820    0.2335    0.0000 C   0  0  0  0  0  0  0  0  0  0  0  0
    0.4325   -1.0040    0.0000 H   0  0  0  0  0  0  0  0  0  0  0  0
    1.8614   -1.0040    0.0000 H   0  0  0  0  0  0  0  0  0  0  0  0
   -0.9979    0.2349    0.0000 O   0  0  0  0  0  0  0  0  0  0  0  0
   -1.7123    1.4724    0.0000 O   0  0  0  0  0  0  0  0  0  0  0  0
   -1.7123    0.6474    0.0000 C   0  0  0  0  0  0  0  0  0  0  0  0
   -2.4268    0.2349    0.0000 C   0  0  0  0  0  0  0  0  0  0  0  0
   -2.4265   -1.8290    0.0000 O   0  0  0  0  0  0  0  0  0  0  0  0
   -3.1409   -0.5915    0.0000 O   0  0  0  0  0  0  0  0  0  0  0  0
   -3.1409   -1.4165    0.0000 C   0  0  0  0  0  0  0  0  0  0  0  0
   -3.8554   -1.8290    0.0000 C   0  0  0  0  0  0  0  0  0  0  0  0
  1  2  1  0      
  2  3  1  0      
  3  4  1  0      
  4  5  1  0      
  5  6  1  0      
  6  1  1  0      
  4  7  2  0      
  7  8  1  0      
  8  9  1  0      
  9 10  1  0      
 10  5  1  0      
  9 11  1  0      
 11 12  1  0      
 12 13  1  0      
 13 14  1  0      
 14 10  1  0      
 11 15  1  0      
 15 16  1  0      
 16 17  1  0      
 17 12  1  0      
 17 18  1  1      
 18 19  2  0      
 12 20  1  1      
  9 21  1  1      
  5 22  1  1      
 10 23  1  6      
 11 24  1  6      
 22 25  1  0      
 25 27  1  0      
 26 27  2  0      
 27 28  1  0      
  2 29  1  1      
 29 31  1  0      
 30 31  2  0      
 31 32  1  0      
M  STY  1   1 SUP
M  SLB  1   1   1
M  SAL   1  4  25  26  27  28
M  SBL   1  1  28
M  SMT   1 OAc
M  SBV   1 28   -6.5179    5.1230
M  STY  1   2 SUP
M  SLB  1   2   2
M  SAL   2  4  29  30  31  32
M  SBL   2  1  32
M  SMT   2 OAc
M  SBV   2 32   -6.5176    4.7092
M  END
