# Supplementary material for: Cytotoxic and Anti-Inflammatory Metabolites from the Soft Coral Scleronephthya gracillimum
Source: MDPI journal article supplement (doi:10.3390/md11061853), 2013-05-29
Supplement: s18 [file s18]

marinedrugs-11-01853-s014.mol
  corina  04141422093D 1   1.00000     0.00000 
CORINA 3.49 0023  12.04.2013
 30 33  0  0  0  0  0  0  0  0999 V2000
    0.1013    2.0000   -0.1080 C   0  0  0  0  0  0  0  0  0  0  0  0
   -0.1253    0.4951   -0.2664 C   0  0  0  0  0  0  0  0  0  0  0  0
    0.4305   -0.2351    0.9579 C   0  0  0  0  0  0  0  0  0  0  0  0
    1.9295    0.0443    1.0809 C   0  0  0  0  0  0  0  0  0  0  0  0
    2.1577    1.5491    1.2388 C   0  0  0  0  0  0  0  0  0  0  0  0
    1.6002    2.2799    0.0154 C   0  0  0  0  0  0  0  0  0  0  0  0
    2.4872   -0.6887    2.3023 C   0  0  0  0  0  0  0  0  0  0  0  0
    3.9863   -0.4085    2.4263 C   0  0  0  0  0  0  0  0  0  0  0  0
    4.2109    1.0953    2.5907 C   0  0  0  0  0  0  0  0  0  0  0  0
    3.6570    1.8258    1.3576 C   0  0  0  0  0  0  0  0  0  0  0  0
    5.6948    1.4023    2.6657 C   0  0  0  0  0  0  0  0  0  0  0  0
    5.8302    2.9284    2.9181 C   0  0  0  0  0  0  0  0  0  0  0  0
    5.3972    3.6384    1.6505 C   0  0  0  0  0  0  0  0  0  0  0  0
    3.9059    3.3281    1.4383 C   0  0  0  0  0  0  0  0  0  0  0  0
    6.4381    0.8213    3.8733 C   0  0  0  0  0  0  0  0  0  0  0  0
    7.6791    1.7472    3.9958 C   0  0  0  0  0  0  0  0  0  0  0  0
    7.2917    3.0881    3.3238 C   0  0  0  0  0  0  0  0  0  0  0  0
    7.4409    4.2247    4.3020 C   0  0  0  0  0  0  0  0  0  0  0  0
    8.2435    5.2233    4.0284 C   0  0  0  0  0  0  0  0  0  0  0  0
    4.9234    3.3432    4.0786 C   0  0  0  0  0  0  0  0  0  0  0  0
    3.7012    1.4477    3.4874 H   0  0  0  0  0  0  0  0  0  0  0  0
    4.1571    1.4440    0.4676 H   0  0  0  0  0  0  0  0  0  0  0  0
    6.1868    1.1250    1.7334 H   0  0  0  0  0  0  0  0  0  0  0  0
    2.4391   -0.3079    0.1840 H   0  0  0  0  0  0  0  0  0  0  0  0
    1.4912    2.0116    2.4152 O   0  0  0  0  0  0  0  0  0  0  0  0
    1.5174    3.4709    2.5821 O   0  0  0  0  0  0  0  0  0  0  0  0
   -1.5480    0.2294   -0.3840 O   0  0  0  0  0  0  0  0  0  0  0  0
   -1.3579    0.4479   -2.5748 O   0  0  0  0  0  0  0  0  0  0  0  0
   -2.0679    0.2314   -1.6215 C   0  0  0  0  0  0  0  0  0  0  0  0
   -3.5374   -0.0364   -1.8218 C   0  0  0  0  0  0  0  0  0  0  0  0
  1  2  1  0      
  2  3  1  0      
  3  4  1  0      
  4  5  1  0      
  5  6  1  0      
  6  1  1  0      
  4  7  1  0      
  7  8  1  0      
  8  9  1  0      
  9 10  1  0      
 10  5  1  0      
  9 11  1  0      
 11 12  1  0      
 12 13  1  0      
 13 14  1  0      
 14 10  1  0      
 11 15  1  0      
 15 16  1  0      
 16 17  1  0      
 17 12  1  0      
 17 18  1  0      
 18 19  2  0      
 12 20  1  0      
  9 21  1  0      
 10 22  1  0      
 11 23  1  0      
  4 24  1  0      
  5 25  1  0      
 25 26  1  0      
  2 27  1  0      
 27 29  1  0      
 28 29  2  0      
 29 30  1  0      
M  STY  1   1 SUP
M  SLB  1   1   1
M  SAL   1  2  25  26
M  SBL   1  1  28
M  SMT   1 OOH
M  SBV   1 28   -5.4251    5.7817
M  STY  1   2 SUP
M  SLB  1   2   2
M  SAL   2  4  27  28  29  30
M  SBL   2  1  30
M  SMT   2 OAc
M  SBV   2 30   -6.4970    4.7504
M  END
$$$$
