# Supplementary material for: Cytotoxic and Anti-Inflammatory Metabolites from the Soft Coral Scleronephthya gracillimum
Source: MDPI journal article supplement (doi:10.3390/md11061853), 2013-05-29
Supplement: s19 [file s19]

marinedrugs-11-01853-s014.mol
  ChemDraw01301415072D

 30 33  0  0  0  0  0  0  0  0999 V2000
   -1.7109   -0.3852    0.0000 C   0  0  0  0  0  0  0  0  0  0  0  0
   -1.7109   -1.2102    0.0000 C   0  0  0  0  0  0  0  0  0  0  0  0
   -0.9965   -1.6227    0.0000 C   0  0  0  0  0  0  0  0  0  0  0  0
   -0.2820   -1.2102    0.0000 C   0  0  0  0  0  0  0  0  0  0  0  0
   -0.2820   -0.3852    0.0000 C   0  0  0  0  0  0  0  0  0  0  0  0
   -0.9965    0.0273    0.0000 C   0  0  0  0  0  0  0  0  0  0  0  0
    0.4325   -1.6227    0.0000 C   0  0  0  0  0  0  0  0  0  0  0  0
    1.1469   -1.2102    0.0000 C   0  0  0  0  0  0  0  0  0  0  0  0
    1.1469   -0.3852    0.0000 C   0  0  0  0  0  0  0  0  0  0  0  0
    0.4325    0.0273    0.0000 C   0  0  0  0  0  0  0  0  0  0  0  0
    1.8614    0.0273    0.0000 C   0  0  0  0  0  0  0  0  0  0  0  0
    1.8614    0.8523    0.0000 C   0  0  0  0  0  0  0  0  0  0  0  0
    1.1469    1.2648    0.0000 C   0  0  0  0  0  0  0  0  0  0  0  0
    0.4325    0.8523    0.0000 C   0  0  0  0  0  0  0  0  0  0  0  0
    2.6460   -0.2277    0.0000 C   0  0  0  0  0  0  0  0  0  0  0  0
    3.1310    0.4398    0.0000 C   0  0  0  0  0  0  0  0  0  0  0  0
    2.6460    1.1072    0.0000 C   0  0  0  0  0  0  0  0  0  0  0  0
    3.0585    1.8217    0.0000 C   0  0  0  0  0  0  0  0  0  0  0  0
    3.8554    2.0352    0.0000 C   0  0  0  0  0  0  0  0  0  0  0  0
    1.8614    1.6773    0.0000 C   0  0  0  0  0  0  0  0  0  0  0  0
    1.1469    0.4398    0.0000 H   0  0  0  0  0  0  0  0  0  0  0  0
    0.4325   -0.7977    0.0000 H   0  0  0  0  0  0  0  0  0  0  0  0
    1.8614   -0.7977    0.0000 H   0  0  0  0  0  0  0  0  0  0  0  0
   -0.2820   -2.0352    0.0000 H   0  0  0  0  0  0  0  0  0  0  0  0
    0.0744    0.2335    0.0000 O   0  0  0  0  0  0  0  0  0  0  0  0
    0.7889   -0.1790    0.0000 O   0  0  0  0  0  0  0  0  0  0  0  0
   -2.4265   -1.6227    0.0000 O   0  0  0  0  0  0  0  0  0  0  0  0
   -3.1409   -0.3852    0.0000 O   0  0  0  0  0  0  0  0  0  0  0  0
   -3.1409   -1.2102    0.0000 C   0  0  0  0  0  0  0  0  0  0  0  0
   -3.8554   -1.6227    0.0000 C   0  0  0  0  0  0  0  0  0  0  0  0
  1  2  1  0      
  2  3  1  0      
  3  4  1  0      
  4  5  1  0      
  5  6  1  0      
  6  1  1  0      
  4  7  1  0      
  7  8  1  0      
  8  9  1  0      
  9 10  1  0      
 10  5  1  0      
  9 11  1  0      
 11 12  1  0      
 12 13  1  0      
 13 14  1  0      
 14 10  1  0      
 11 15  1  0      
 15 16  1  0      
 16 17  1  0      
 17 12  1  0      
 17 18  1  1      
 18 19  2  0      
 12 20  1  1      
  9 21  1  1      
 10 22  1  6      
 11 23  1  6      
  4 24  1  6      
  5 25  1  1      
 25 26  1  0      
  2 27  1  1      
 27 29  1  0      
 28 29  2  0      
 29 30  1  0      
M  STY  1   1 SUP
M  SLB  1   1   1
M  SAL   1  2  25  26
M  SBL   1  1  28
M  SMT   1 OOH
M  SBV   1 28   -5.4251    5.7817
M  STY  1   2 SUP
M  SLB  1   2   2
M  SAL   2  4  27  28  29  30
M  SBL   2  1  30
M  SMT   2 OAc
M  SBV   2 30   -6.4970    4.7504
M  END
